## Populating a Continent: Phylogenomics Reveal the Timing of Australian Frog Diversification

Ian G. Brennan<sup>1,2,\*</sup>, Alan R. Lemmon<sup>3</sup>, Emily Moriarty Lemmon<sup>3</sup>,  
Conrad J. Hoskin<sup>4</sup>, Stephen C. Donnellan<sup>5,6</sup> and J. Scott Keogh<sup>1</sup>

<sup>1</sup>Division of Ecology & Evolution, The Australian National University, Canberra, ACT 2601, Australia

<sup>2</sup>Natural History Museum, Cromwell Road, London SW7 5BD, UK

<sup>3</sup>Department of Biological Science, Florida State University, Tallahassee FL 32306, USA

<sup>4</sup>College of Science and Engineering, James Cook University, Townsville, QLD 4811, Australia

<sup>5</sup>School of Biological Sciences, The University of Adelaide, Adelaide, SA 5005, Australia

<sup>6</sup>South Australian Museum, North Terrace, Adelaide, SA 5000, Australia

\*Corresponding author: [iangbrennan@gmail.com](mailto:iangbrennan@gmail.com)

*Abstract*

The Australian continent's size and isolation make it an ideal place for studying the accumulation and evolution of biodiversity. Long separated from the ancient supercontinent Gondwana, most of Australia's plants and animals are unique and endemic, including the continent's frogs. Australian frogs comprise a remarkable ecological and morphological diversity categorized into a small number of distantly related radiations. We present a phylogenomic hypothesis based on an exon-capture dataset that spans the main clades of Australian myobatrachoid, pelodyadid hyloid, and microhylid frogs. Our time-calibrated phylogenomic-scale phylogeny identifies great disparity in the relative ages of these groups which vary from Gondwanan relics to recent immigrants from Asia and include arguably the continent's oldest living vertebrate radiation. This age stratification provides insight into the colonization of, and diversification on, the Australian continent through deep time, during periods of dramatic climatic and community changes. Contemporary Australian frog diversity highlights the adaptive capacity of anurans, particularly in response to heat and aridity, and explains why they are one of the continent's most visible faunas.

*Keywords:* Anuran; adaptive radiation; Gondwana; phylogenetics

## AUSTRALIAN FROG PHYLOGENOMICS

### *Introduction*

Frogs are an ancient vertebrate radiation originating in the Permian more than 250 million years ago (Hime et al. 2021). They share a unique and unusual morphology yet are a spectacularly successful group, with more than 7,500 extant species spread across most of the world (AmphibiaWeb 2022). Despite their age, much of this diversity, potentially more than 95%, has developed since the Cretaceous-Paleogene mass extinction (65 mya) (Feng et al. 2017). Australia is one of the driest continents on Earth yet, surprisingly, it is home to nearly 250 frog species. Australia's frogs belong to just four anuran groups spread widely across the “modern frog” suborder Neobatrachia: (1) Myobatrachoidea comprising the Limnodynastidae (66 species) and Myobatrachidae (70 spp.); (2) Hylloidea represented by the family Pelodyadidae (91 spp.); (3) the Microhylidae subfamily Asterophryinae (24 spp.); and (4) a single Ranidae species in the genus *Papurana*. These groups show very different levels of species richness and geographic spread across the continent (Fig.1). However, together they have radiated to inhabit almost every part of Australia including tropical rainforests, alpine streams, featureless boulder piles, and hyper-arid deserts.

While we know a great deal about many aspects of Australian frog biology (Tyler 1998; Anstis 2017), the age of each of the major groups and the timing of their subsequent diversification, is poorly understood. Since the origin of frogs over 250 million years ago, the landmass that is now Australia has traveled extensively. Long ago it was part of the supercontinent Pangea before separating as a component of Gondwana alongside South America, Africa, Antarctica, and India. Sometime around 50 million years ago Australia separated from Antarctica and began drifting alone towards Asia (Hall 2002; Bijl et al. 2013). Given the long evolutionary history of frogs, and Australia's varied geographic affinities with other landmasses, we ask three related questions: (1) Where did Australia's frogs originate? (2) When did they get to Australia? and (3) Who and where are their closest relatives? Answering these questions provides context for the varied species richness and ecological diversity of these groups and offers important insight into the evolution of a continental fauna.

### *Materials and Methods*

We assembled an exon-capture dataset comprising 99 frog species spanning all major anuran clades and with particular focus on the families Pelodyadidae, Microhylidae, Limnodynastidae and Myobatrachidae (Table S1). This dataset includes near-complete (92%) genus-level sampling of Australia's frogs. We generated new Anchored Hybrid Enrichment (AHE—Lemmon et al. 2012) data for 83 samples and combined these with outgroup samples from Hime et al.'s (2021) amphibian phylogenomic dataset. Outgroup sampling was designed around maximizing commonly used anuran fossil calibrations to provide a consistent time-calibrated phylogenomic estimate of Australian frogs. Data from different AHE projects were combined using custom scripts which relied on *metablast* to identify orthologous loci (*blast best reciprocal hit*) (Benoit & Drost 2021), *mafft* to align them (*--add, --keeplength*) (Katoh et al. 2013), and *AMAS* to manipulate alignments (Borowiec 2016). We reconstructed individual genealogies for our exon-capture data (n = 450) under maximum-likelihood in IQTREE (Nguyen et al. 2015), allowing the program to assign the best fitting model of nucleotide substitution using ModelFinder (Kalyaanamoorthy et al. 2017) and then perform 1,000 ultrafast bootstraps (Minh et al. 2013). We then estimated a species tree using the quartet-based summary method ASTRAL III (Zhang et al. 2018) with IQTREE gene trees as input. To complement our coalescent-consistent summary method we also estimated a species tree from the concatenated

alignment using the edge-unlinked partition model GHOST implemented in IQTREE. This allowed us to more accurately model rate variation among sites and samples. To estimate  
65 divergence times among taxa on the ASTRAL species tree we applied a series of fossil calibrations first compiled by Feng et al. (2019) (Table S2) and used the Bayesian divergence time software MCMCtree (Rannala & Young 2007). We started by concatenating all exonic loci (n=390; Supp. *Sequence Identity*) and partitioning them into two partitions, first and second codons together, and third codons separately, following the strategy of dos Reis et al. (2018). Complex partitioning  
70 strategies such as filtering by evolutionary rate are possible but less influential than the absolute number of partitions (dos Reis et al. 2012). Additional data partitions ultimately incur substantial computational costs for modest increases in dating precision, and so we opted instead for a more conservative approach. We then used *baseml* to estimate approximate likelihoods (dos Reis & Yang 2011) and branch lengths before running *mcmcree* on the gradient and Hessian (in.BV file)  
75 for ten replicate analyses. We inspected mcmc files for stationarity and compared for convergence, then combined them using logCombiner, and used this combined mcmc file to summarize divergence times on our tree (*print = -1* in .ctl file). Sample, alignment, and gene tree summary statistics are presented in Supplementary Material (Fig.S1-3) and are available alongside all other materials on Dryad (doi:10.5061/dryad.zpc866tcj) and GitHub  
80 ([https://github.com/IanGBrennan/Crown\\_Frogs](https://github.com/IanGBrennan/Crown_Frogs)).

To investigate the biogeographic origins of Australian frogs we reconstructed ancestral ranges using *BioGeoBEARS* (Matzke 2014). The deep timescale of frog evolutionary history necessitates accounting for continental rearrangement and dispersal barriers by incorporating time-stratified information from plate tectonics. To accomplish this we designed a series of models that  
85 augment dispersal probability as a function of distance among areas and adjacency. Briefly, these models penalize dispersal probability as distance between areas increases, and as the *type* of distance changes (e.g. over-land vs. over-water dispersal). To identify the dispersal path of the pelodryadid tree frogs and how they arrived in Australia from a South American ancestor (Pyrton 2014), we designed two data sets. The first requires the Pelodryadidae to have travelled from South  
90 America through Antarctica and into Australia (*H1*) and the second allows an overwater dispersal directly from South America to Australia (*H2*). Comparative model fit was assessed via AIC. Model specifics can be found in the *Supplementary Materials and Methods*.

### Results

95 Species tree topologies are nearly identical across the quartet-based coalescent method (ASTRAL) and concatenation under the GHOST heterotachy model (IQTREE), and are broadly consistent with previously published phylogenomic frog hypotheses (Feng et al. 2017; Streicher et al 2018; Streicher et al. 2020; Hime et al. 2021) (Fig.2, S4—S6). We estimate well-supported phylogenies with few unresolved nodes among Australian taxa. Australian microhylids fall into  
100 two non-sister clades, each nested within the primarily New Guinean Asterophryinae. Pelodryadids have diverged into two to three deep groups, with *Cyclorana* and *Nyctimystes* embedded within divergent clades of *Litoria*. Ancient splits among myobatrachoids show some uncertainty with a paraphyletic estimation of the Myobatrachidae. There is strong support uniting the genera *Mixophyes* and *Rheobatrachus*, and moderate support (LPP 90) places this  
105 myobatrachid clade as sister to the Limnodynastidae, to the exclusion of remaining myobatrachid genera.

Concatenated and coalescent topologies differ at three very short branches which bear no significant implications for our understanding of the relationships of Australian frogs (Fig.S5).

## AUSTRALIAN FROG PHYLOGENOMICS

110 Successive short branching events such as these are known to mislead tree inference from concatenated data, and so are not surprising (Linkem et al. 2016). We find support in the GHOST model for four distinct rate classes, which vary in total tree length (TTL) by more than 50x, providing evidence of strong heterotachy among sites. The distribution of TTL among branches across the four trees however, is largely consistent suggesting little effect of heterotachy among lineages.

115 Crown divergences of the three Australian frog radiations can be clearly separated into old (Myobatrachidae and Limnodynastidae–80 mya), intermediate (Pelodyadidae–30 mya), and young (Asterophryinae–11 mya) (Fig.2). The youngest Australian group, microhylids in the genera *Austrochaperina* and *Cophixalus*, are embedded deeply within the subfamily Asterophryinae and appear to represent two separate, relatively recent ( $\approx 11$  mya) dispersals into Australia from New Guinea. Pelodyadidae tree frogs also share a complex biogeographic history across Australasia, with several species groups split across the Torres Strait (separating Australia and New Guinea), suggesting frequent biotic exchange. However, the origins of the Pelodyadidae are far older. Their closest extant relatives are the iconic Phyllomedusidae found throughout Central and South America, with the crown split between extant Pelodyadidae in Australia/New Guinea and South America estimated at approximately 40 million years ago. Australian myobatrachids and limnodynastids also have their closest living relatives in South America—the Calyptocephallellidae, represented here by *Calyptocephallela*, the Helmeted Water Toad of Chile. The crown split between extant myobatrachoids in Australia and calyptocephallellids in Chile is ancient, occurring more than 100 million years ago.

130 Biogeographic modelling provides support for a diversification scenario in which the dispersal of frogs was influenced by vicariant events (parameter  $j$ ), distance among biogeographic regions ( $x$ ), and dispersal type ( $w$ ; over-land vs. over-water) (Table S3). The top two models account for more than 80% of AIC weight, and both correspond to pelodyadid dispersal Hypothesis 1 in which treefrogs dispersed through Antarctica to reach Australia (DEC+j+x+w HI, AICw 59.7; DEC+j+x HI, AICw 21.5). The preferred model represents a meaningful improvement over similar models under a pelodyadid dispersal Hypothesis 2 (Fig.3, S7; Table S3). Parameter estimates of  $x$  under the top two models suggest that doubling the distance between areas reduces dispersal probability by one-third to one-half. Parameter estimation of  $w$  under the preferred model suggests that overland dispersal probability among non-adjacent areas is one-third that of between adjacent areas, and overwater dispersal probability is just one-tenth.

140 Ancestral range reconstructions provide evidence that both myobatrachoid and pelodyadid frogs are descended from South American ancestors. Asterophryinae microhylids, in which the Australian microhylids are embedded, likely diverged from an ancestor found in Asia.

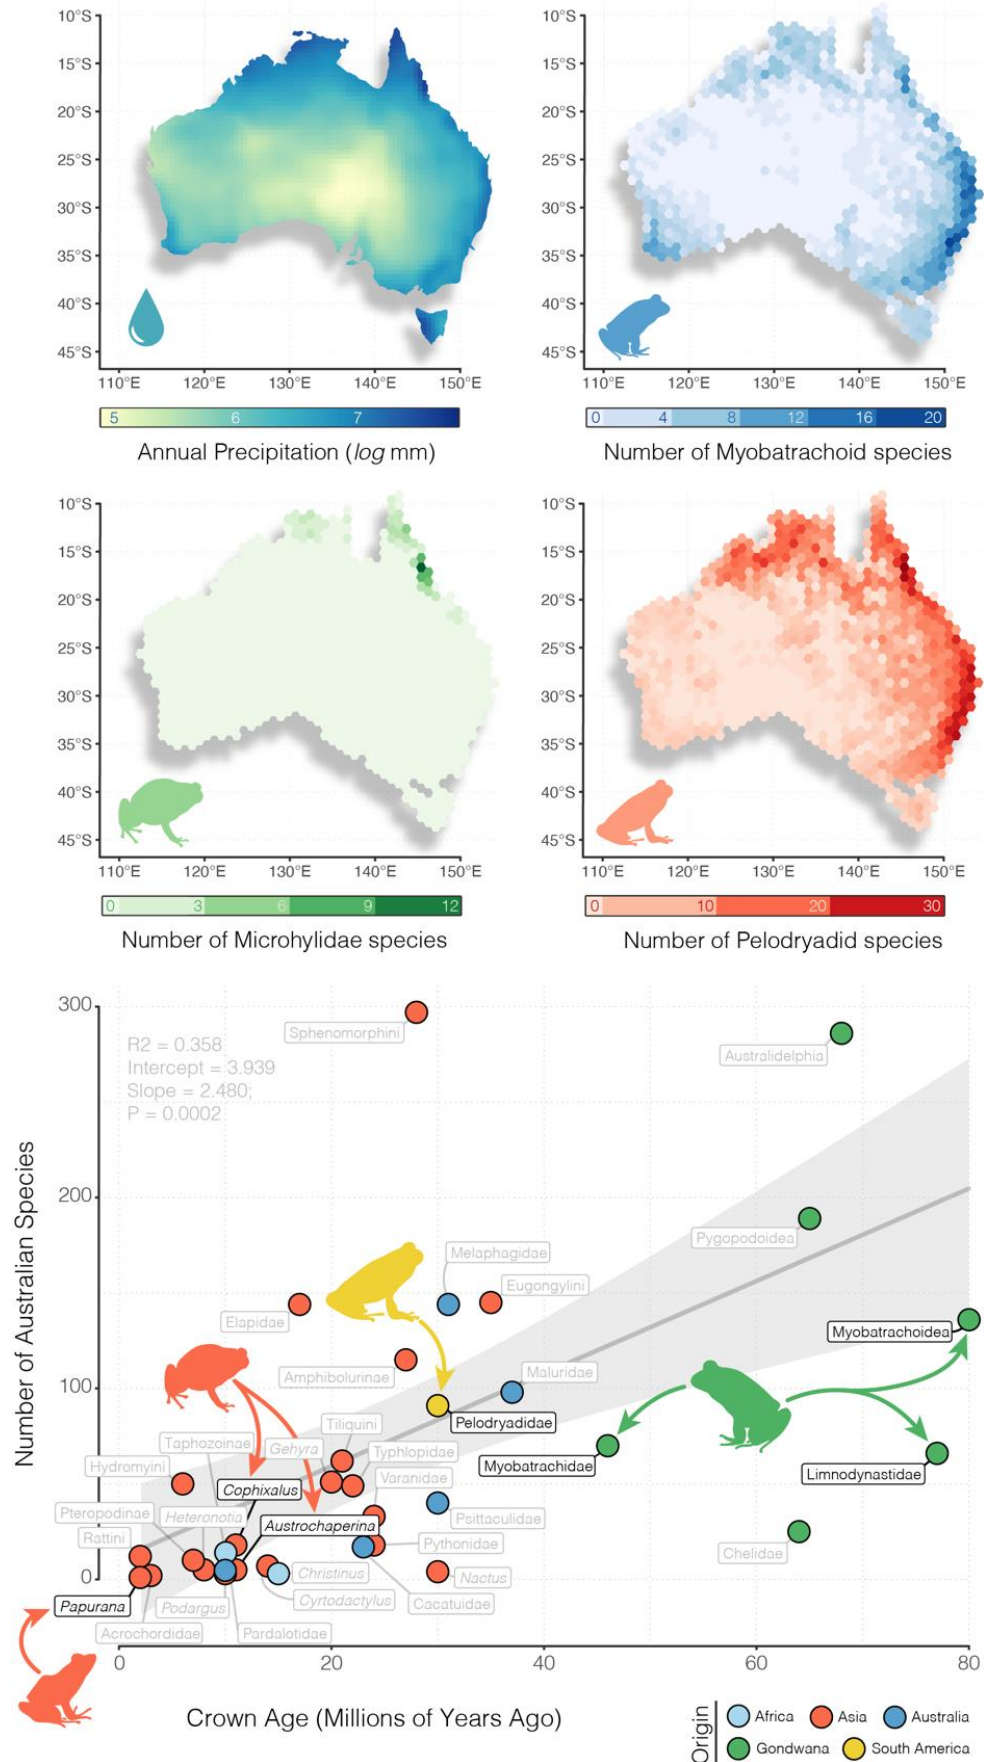



## AUSTRALIAN FROG PHYLOGENOMICS

145

Figure 1. Australian frogs show an imbalance in species richness, age, and geographic spread. Above, maps of richness for the three focal radiations (with Limnodynastidae and Myobatrachidae presented together as Myobatrachoidea) represent visually how contemporary patterns of frog richness reflect water availability, and are highest in the wet temperate, subtropical, and tropical rainforests of the east coast. We show annual precipitation here for ease of interpretation but Australian frog richness is potentially better explained by actual evapotranspiration (Coops et al. 2018). Species occurrence records were collated from the Atlas of Living Australia (<https://ala.org.au>). Below, Australian radiations can be divided broadly into (1) relictual Gondwanan clades >40 myo (green), (2) ancient colonizing groups (>20 myo, <40 myo; varied colors), or (3) immigrant clades of Asian origin (orange). Each point is colored according to the region of hypothesized origin and labeled by the narrowest phylogenetic taxonomy. Black labels indicate focal groups and grey labels indicate other Australian vertebrate clades. Regression in background is fit to all points with the exception of Limnodynastidae and Myobatrachidae (included jointly as Myobatrachoidea) and shows a general pattern of increasing species richness with age. This pattern holds equally for a regression of just frog clades ( $R^2=0.849$ , intercept=1.827, slope=1.805,  $p=0.016$ ).

150

155

160

### *Discussion*

Here we present the first reliable estimates of relationships among nearly all of Australia's native frog genera (25 of 27) and major clades of the diverse genus *Litoria*. Our investigation into the timing and origins of the Australian frog fauna reveals a staggered colonization and population of the continent. This stratified arrival and radiation of Australian frogs took place under the varied environmental conditions of vastly different eras. Across these eras Australia has flourished through a warm and wet Eocene, cooling and drying following the onset of Antarctic glaciation in the Oligocene, warm and forested Miocene, and a gradual aridification leading to its present status (Byrne et al. 2011, Pross et al. 2012, Macphail & Hill 2018, Mao & Retallack 2019).

165

170

### *Origins and Biogeography*

The Myobatrachidae and Limnodynastidae (together—myobatrachoids) represent the oldest, most diverse (136 spp.), and only near-endemic of Australia's frog radiations (4 spp. are found in New Guinea). They share a long history with South America and its Gondwanan past. Anchored by a deep split with the South American *Calyptocephalella* (roughly 100 mya; Fig.2), early divergences among the myobatrachoids, principally between *Mixophyes*, *Rheobatrachus*, and the limnodynastids, occurred in the late Cretaceous (80–70 mya), preceding the isolation of Australia from Antarctica. This dates to a time when South America, Antarctica, and Australia were a continuous landmass that was likely temperate in climate (Palazzesi & Barreda 2007; Mörs et al. 2020). The phylogenetic depth and distribution of myobatrachoids and calyptocephalellids across these now widely disjunct continents suggests a historically continuous distribution across southern Gondwana, including Antarctica. This idea is supported by the recent discovery of an extinct calyptocephalellid from mid-Miocene Antarctica that lived more than 40 mya (Mörs et al. 2020). The persistence of calyptocephalellids in Antarctica into the Late Eocene highlights the dichotomy between young extant myobatrachid and limnodynastid diversity (most species < 30 mya) and ancient splits between limnodynastids and myobatrachids and within myobatrachids (> 70 mya). The tips of these long branches are likely the survivors of a much greater southern

175

180

185

190 Gondwanan myobatrachoid diversity, potentially mirroring the diversity of extinct calyptocephalellids through southern South America and Patagonia (Nicoli et al. 2022).

Australian myobatrachoids however are not the only group with close connections to South America. The Pelodyadidae are a species rich (>220 spp.) and morphologically diverse clade of Australasian frogs. Embedded within the primarily Neotropical treefrogs, they show a more recent  
195 late-Eocene divergence from their South American relatives the Phyllomedusidae, some 40 mya. Crown divergence of the pelodyadids occurred in the mid-to-late Oligocene (30 mya) before erupting into a radiation across Australia and New Guinea in the early Miocene. This timing has spurred speculation about the origins of pelodyadids either as part of a young Gondwanan group or more recent over-water dispersers from South America (Pyron 2014). Divergence between  
200 phyllomedusids and pelodyadids 40 mya aligns with the opening of the Drake Passage and separation of South America from Antarctica (Toumoulin 2020). Unfortunately, this does not provide any certainty about how pelodyadids arrived in Australia. While the Brazil Current would have provided a favorable trajectory for rafting frogs, the over-water distance between South America and Australia remained immense. Our biogeographic modelling indicates that the  
205 probability of overwater dispersal is just a fraction of that overland, making rafting seem improbable. Instead, we suggest a more likely scenario is that pelodyadids dispersed from South America through Antarctica and into Australia (Fig.3). Climate reconstructions suggest warm temperate/tropical habitats across Antarctica which would have been suitable through a long period of the Eocene (Pross et al. 2012). Dispersal via Antarctic land bridges would have had to  
210 occur prior to the Eocene-Oligocene cooling (34 mya) that blanketed Antarctica beneath an ice sheet (van den Ende et al. 2017).

Contrasting with the comparatively ancient limnodynastids, myobatrachids, and pelodyadids, Australia's youngest anuran radiation are the microhylids. Embedded deeply in the Asterophryinae subfamily, two similarly aged clades (12–13 mya) of *Austrochaperina* and  
215 *Cophixalus* crossed the gap from New Guinea to Australia in the mid Miocene. This time frame coincides with a period of increased variation in sea surface levels driven by cooling global temperatures following the mid Miocene climatic optimum. Dropping sea levels likely repeatedly exposed a landbridge between southern New Guinea and northern Australia (both Cape York and the Top End) and facilitated biotic exchange between these landmasses (Mitchell et al. 2014). The  
220 young age of these clades, and existence of two other species-rich incumbent frog clades in the pelodyadids and myobatrachoids potentially explains why Australian microhylids are relatively species poor (*Austrochaperina*—5 spp., *Cophixalus*—18 spp.) and morphologically conservative compared to their New Guinean neighbors (200+ spp.), reflecting a pattern seen in monitor lizards (Pavón-Vázquez et al. 2021).

225 The sole Australian ranid *Papurana daemeli* is native but not endemic to the continent, and can be found broadly across Australo-Papua, extending to just beyond the edge of the Sahul shelf (Reilly et al. 2022). It belongs to a clade of frogs distributed throughout southeast Asia, Wallacea, and Sahul, with other *Papurana* species found in New Guinea and the Solomon Islands (Oliver et al. 2015; Chan et al. 2020). Though not included in our phylogenomic sampling, *Papurana daemeli*  
230 is likely a relatively young species (<7 mya) with limited divergence between populations found in Wallacea and Sahul (Reilly et al. 2022). The broad distribution of *P. daemeli* across Australo-Papua suggests either a very recent colonization of Australia or vicariant speciation followed by subsequent dispersal out of Australia and back into New Guinea and Wallacea.

235 The staggered temporal origins of Australian frogs exemplifies the general colonization history of Australian vertebrates. Radiations of mammals, birds, frogs, and reptiles fall into



## AUSTRALIAN FROG PHYLOGENOMICS

discretized temporal groups broadly identified as (1) Gondwanan relics >40 myo, (2) old established clades (20—40 myo) with varied origins, or (3) recent immigrants from Asia (<20 myo). The Limnodynastidae and Myobatrachidae fall undoubtedly into the Gondwanan group alongside ancient Australian radiations like Australidelphian marsupial mammals which include koalas, kangaroos, and Tasmanian devils; side-necked chelid turtles; and pygopodoid geckos which include the bizarre limbless pygopodids. These groups—with the exception of pygopodoids—have close links to South American relatives based on molecular and fossil evidence (Georges et al. 1999; Mitchell et al. 2014). While a Pelodyadidae link with South America is clear, they are perhaps the sole radiation to have emigrated from South America to Australia since the continental breakup. Most other similarly aged Australian groups instead show signal of Asian or Australian origins. In comparison, the Australian microhylids (*Austrochaperina*, *Cophixalus*) and the ranid *Papurana daemeli* are relatively young arrivals from New Guinea with deeper origins in Asian groups. Both the Asterophryinae and Ranidae, to which these species belong, have a long history in the Sunda and Wallacean regions, reflecting patterns of old diversity in this tectonically active area. Alongside a number of other groups such as pythons (Esquerré et al. 2020), monitor lizards (Brennan et al. 2021), honeyeater birds (Marki et al. 2017), dragon lizards (Tallowin et al. 2020), elapid snakes (Keogh 1998), various gekkonid gecko genera (Heinicke et al. 2011), megabats (Tsang et al. 2020), frogmouth birds (Oliver et al. 2020), cockatoos and parrots (Schweizer et al. 2011), several skink subfamilies (Skinner et al. 2011), and two rodent groups (Roycroft et al. 2020), they share diversity across Australia and New Guinea with repeated exchange between the two islands. Many of these groups show a telltale stepping stone biogeographic pattern that links them back to mainland Asian ancestors, with Australo-Papuan members deeply phylogenetically nested. In general, these Australian clades show a pattern of increasing species richness with clade age, however the drivers of such a pattern are potentially idiosyncratic (Fig.1) (Wiens 2011; Rabosky et al. 2012).

### *Macroevolutionary Patterns*

The radiation of frogs in Australia has occurred over a deep timescale and across a changing climatic landscape. Old species-poor lineages have become confined to the mesic-temperate fringes of the continent, while new niches and species have popped up in the expanding arid zone (Morgan et al. 2007; Novikova et al. 2020). And while frogs are found across most of the Australian continent, their basic moisture requirements and desiccation sensitivity mean that Australian amphibian diversity shows a stark mesic-arid gradient (Fig.1), similar to that seen for birds and mammals, and the inverse of lizards (Powney et al. 2010; Coops et al. 2018). Not all has been lost in the arid center though—several independent clades of dry-country inhabitants have evolved among Australia’s harsh sandy and stony deserts. *Neobatrachus*, *Notaden*, and *Cyclorana* have all evolved to aestivate through the hottest and driest seasons. These genera (commonly known as the water-holding frogs) are capable of growing epidermal cocoons to retain moisture that may see them through periods of extreme drought lasting from months to years (van Beurden 1980).

Along with changes in habitat and ecology, Australia’s frogs have also accumulated vast diversity in reproductive strategy, ontogenetic trajectory, and morphology (Crump 2015, Duellman 1992, Sherratt et al. 2018). While we do not present data on these topics, our well-resolved phylogenetic hypothesis provides new context for the macroevolution of some of these extreme traits. Unique rearing habits such as raising young in stomachs (*Rheobatrachus*), hip-pockets (*Assa*), or subterranean nests (*Myobatrachus*) exist on both long branches and deeply

285 nested taxa suggesting a remarkable frequency of transition among states. Similarly,  
morphological variation has rapidly evolved to dramatic extremes. The long limbed highly aquatic  
*Litoria dahlia* with webbed feet and dorsally situated eyes is sister to the short-limbed burrowing  
water-holding frogs *Cyclorana* (Vidal-Garcia & Keogh 2015). Together these frogs are embedded  
deeply within the otherwise toe-padded and arboreal tree frogs, highlighting the adaptive capacity  
of pelodyadids. Myobatrachoids too have taken ecomorphology to the extreme, offering us what  
is perhaps the world's strangest living anuran, the turtle frog *Myobatrachus gouldii*. In pursuit of  
290 their backwards burrowing lifestyle and termite-heavy diet, *Myobatrachus* lack many of the  
characteristics we typically associate with frogs. Their beady black eyes are set in small heads and,  
alongside their sister taxon *Arenophryne*, they crawl—not jump—across the ground on short limbs  
that are incapable of hopping (Vidal-Garcia et al. 2014).

## AUSTRALIAN FROG PHYLOGENOMICS

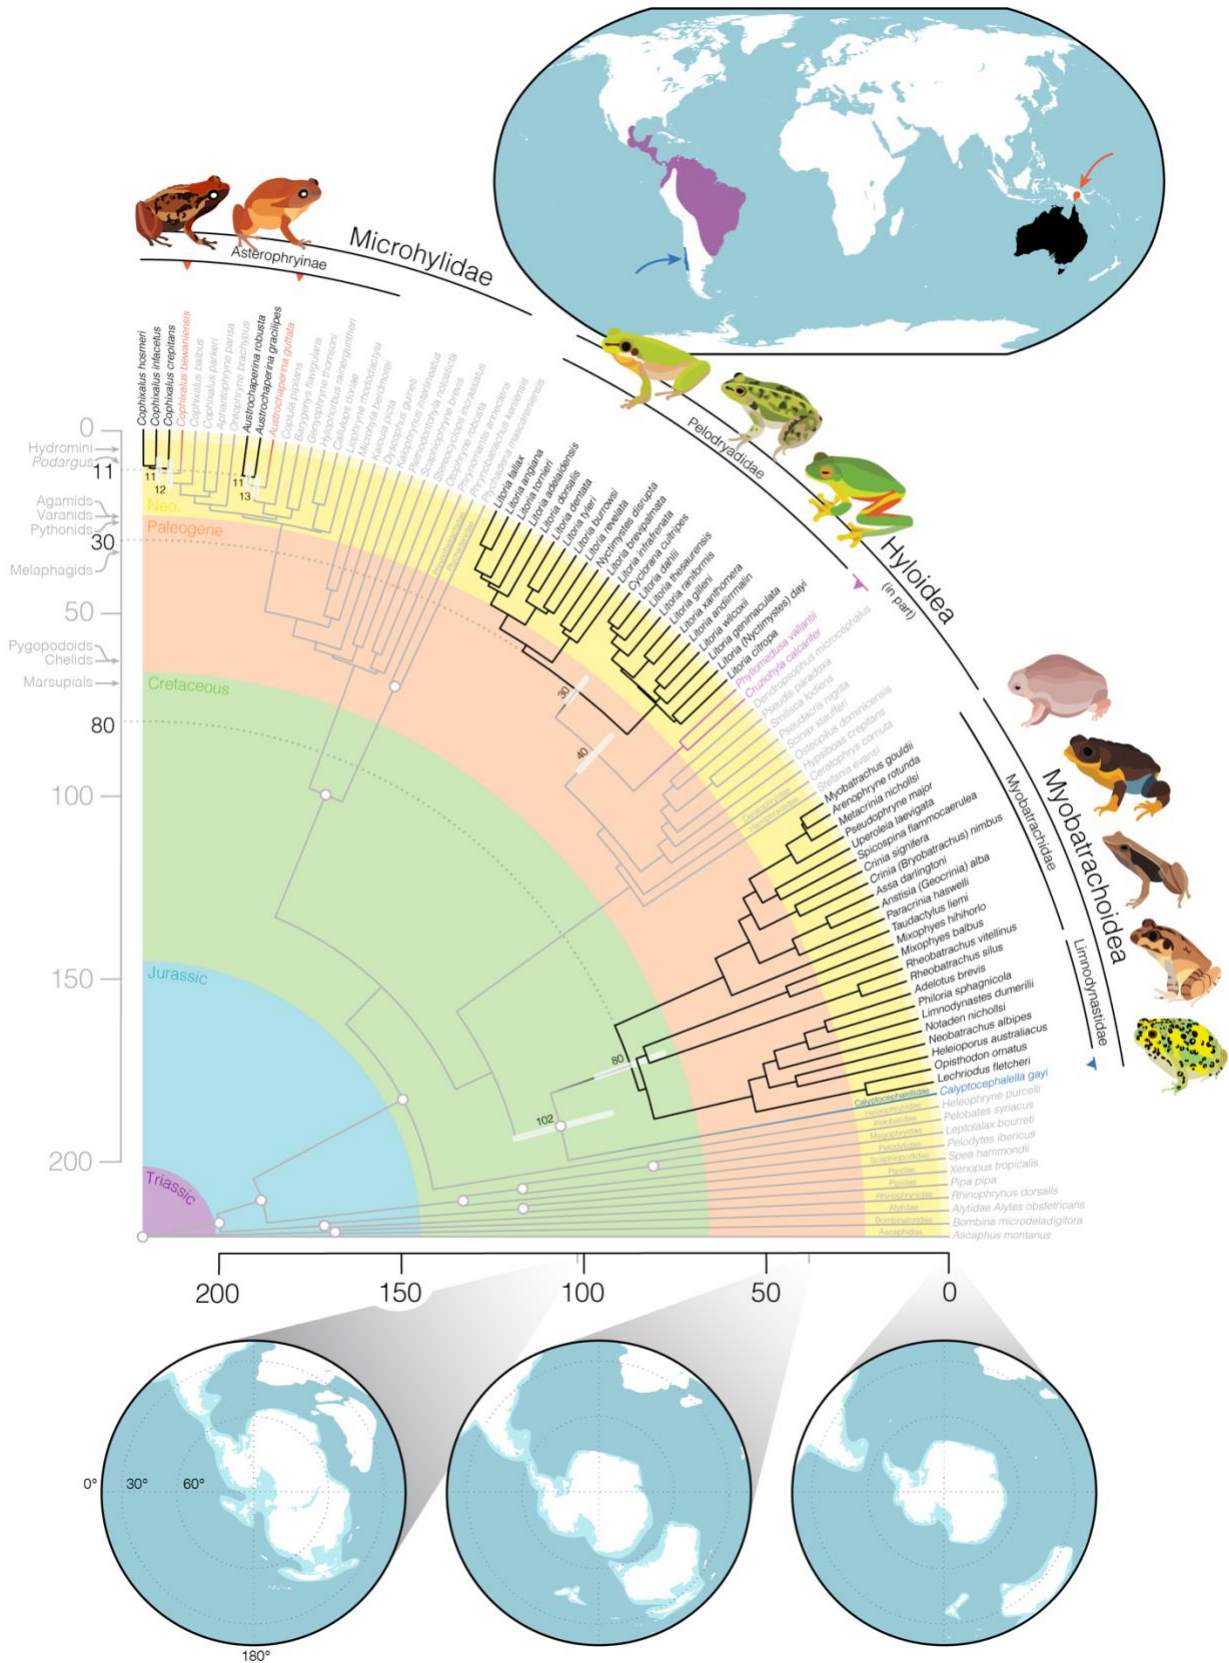

295 Figure 2. Time-calibrated frog phylogeny highlights the varied origins and staggered arrival of the  
four major frog families that comprise the Australian anuran fauna. Primarily Australian clades  
are identified by black branches and text, their closest living relatives outside of Australia are noted  
by colored branches and text, and outgroup taxa are grey. White circles at nodes identify the  
location of fossil calibrations (see Table S2). Upper inset map shows the general geographic  
300 location of: (red) closely related microhylids in New Guinea, (purple) phyllomedusid hylids in  
South America, and (dark blue) *Calyptocephallela* in Chile. Lower inset maps show the connection  
and proximity of Australia to other Gondwanan continents as Australia drifted away over the past  
100 million years. White indicates contemporary coastlines, light blue the continental plates, and  
dark blue the oceans. Maps were generated using GPlates and input files modified from Landis  
(2017). Partial fan phylogeny was plotted using *phytools* in the R programming environment.  
305 Annotations on vertical time axis show the age of crown divergences of other notable Australian  
groups for temporal context (see Fig.1). Species illustrated clockwise from top left: *Cophixalus*  
*infacetus*, *Austrochaperina robusta*, *Litoria fallax*, *Litoria dahlia*, *Litoria xanthomera*,  
*Myobatrachus gouldii*, *Spicospina flammocaerulea*, *Taudactylus acutirostris*, *Mixophyes balbus*,  
*Notaden bennettii*.

310



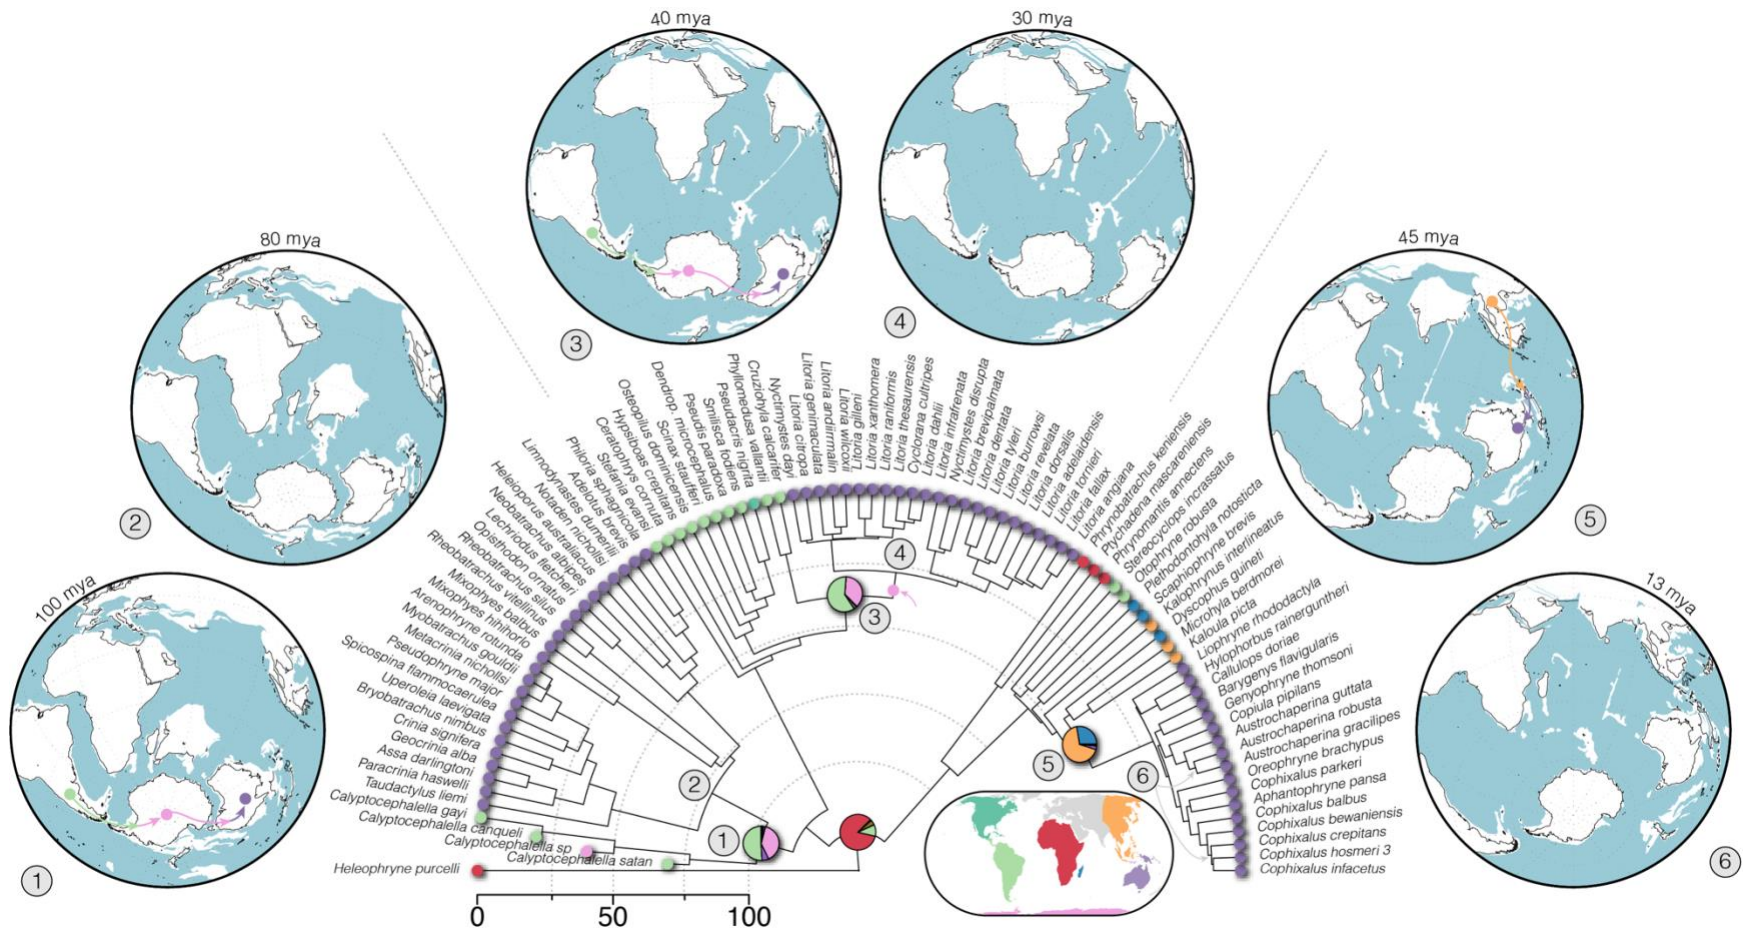

311  
 312 Figure 3. Simplified biogeographic history of Australian frogs with a focus on the range reconstruction of their immediate ancestors  
 313 (complete figure in Fig.S7). Ranges have been estimated under the preferred model DEC+ $\dot{J}$ + $x$ + $w$  supporting Hypothesis 1 (Antarctic  
 314 dispersal of Pelodyradidae frogs; pink arrow on tree indicates ancestral pelodyrid constrained to Antarctica) in *BioGeoBEARS*. Pie  
 315 charts represent range probability at nodes with colors corresponding to inset map. Circular world maps show geological reconstructions  
 316 at relevant time points, with numbers mapped to nodes of interest. Colored arrows indicate hypothesized dispersal paths for each clade.  
 317 Under this biogeographic model the ancestors of both the Myobatrachoidea and Pelodyradidae lived in South America, and Australo-  
 318 Papuan microhylids (Asterophryinae) originate from an Asian ancestor. The most likely dispersal path for the Pelodyradidae included



319 expansion across Antarctica after divergence from the Phyllomedusidae. Phylogeny plotted with *phytools*, maps generated by the Ocean  
320 Drilling Stratigraphic Network (<https://www.odsn.de/odsn/services/paleomap/paleomap.html>).  
321

322 *Conclusion*

323 Australian frogs offer important insights into colonization, persistence, and diversification  
324 of a major continental group through deep time. The varied species richness, timing of  
325 diversification, and ecomorphological diversity among replicate radiations provides evidence of  
326 the processes dictating the accumulation of biodiversity. Beyond the temperate and tropical forests  
327 of the east and north coast, the Australian continent is an open country of habitat scarcely  
328 welcoming to frogs. Despite this, anurans have a long history in Australia and have diversified into  
329 an amazing array of forms, colors, and lifestyles. This success is potentially the result of the  
330 stratified temporal arrival of the three main frog clades and possibly exaggerated by their  
331 ecological differences. Our phylogenetic framework provides a foundation for further examining  
332 how temporal changes to climate, habitat, and niche space have influenced the diversification of  
333 one of Australia's richest and most unique vertebrate faunas.

334  
335 *Data Accessibility*

336 Sequence alignments, analysis control files, and phylogenetic trees can be downloaded  
337 from [Dryad](#) (doi:10.5061/dryad.zpc866tcj) and [GitHub](#)  
338 ([https://github.com/IanGBrennan/Crown\\_Frogs](https://github.com/IanGBrennan/Crown_Frogs)).

339  
340 *Conflicts of Interest*

341 The authors recognize no conflicts of interest, either direct or indirect, that might bias the  
342 conclusions, implications, or opinions stated in this work.

343  
344  
345 *Acknowledgments*

346 Thank you to colleagues and staff at Australian museums and more generally across  
347 Australia for generously donating tissues and locality information for many frogs. We also thank  
348 the technical staff at our institutions for their support and hard work generating the genetic data  
349 presented here. The contributions of our many communities have made this work possible. JSK,  
350 CJH, and SCD thank the Australian Research Council for ongoing support. We appreciate  
351 comments from Isabel Sanmartín, Rayna Bell, and two anonymous reviewers that helped to  
352 improve a previous version of this manuscript.

353 References

- 354 AmphibiaWeb. (2022). *AmphibiaWeb: Information on amphibian biology and conservation*.
- 355 Anstis, M. (2017). *Tadpoles and frogs of Australia*. New Holland Publishers Pty Limited.
- 356 Benoit, M., Drost, H. G. (2021). A Predictive Approach to Infer the Activity and Natural Variation  
357 of Retrotransposon Families in Plants. In: Cho J. (eds) *Plant Transposable Elements*.  
358 *Methods in Molecular Biology*, vol 2250. Humana, New York, NY.
- 359 Bijl, P. K., Bendle, J. A., Bohaty, S. M., Pross, J., Schouten, S., Tauxe, L., Stickley C. E., McKay,  
360 R. M., Röhl, U., Olney, M., Sluijs, A., Escutia, C., Brinkhuis, H., & Expedition 318  
361 Scientists. (2013). Eocene cooling linked to early flow across the Tasmanian Gateway.  
362 *Proceedings of the National Academy of Sciences*, 110(24), 9645-9650.
- 363 Borowiec, M. L. (2016). AMAS: a fast tool for alignment manipulation and computing of  
364 summary statistics. *PeerJ*, 4, e1660.
- 365 Brennan, I. G., Lemmon, A. R., Lemmon, E. M., Portik, D. M., Weijola, V., Welton, L., Donnellan,  
366 S. C., & Keogh, J. S. (2021). Phylogenomics of monitor lizards and the role of competition  
367 in dictating body size disparity. *Systematic Biology*, 70(1), 120-132.
- 368 Byrne, M., Steane, D. A., Joseph, L., Yeates, D. K., Jordan, G. J., Crayn, D., ... & Weston, P. H.  
369 (2011). Decline of a biome: evolution, contraction, fragmentation, extinction and invasion  
370 of the Australian mesic zone biota. *Journal of biogeography*, 38(9), 1635-1656.
- 371 Chan, K. O., Hutter, C. R., Wood Jr, P. L., Grismer, L. L., & Brown, R. M. (2020). Larger,  
372 unfiltered datasets are more effective at resolving phylogenetic conflict: Introns, exons,  
373 and UCEs resolve ambiguities in Golden-backed frogs (Anura: Ranidae; *Hylarana*).  
374 *Molecular phylogenetics and evolution*, 151, 106899.
- 375 Coops, N. C., Rickbeil, G. J., Bolton, D. K., Andrew, M. E., & Brouwers, N. C. (2018).  
376 Disentangling vegetation and climate as drivers of Australian vertebrate  
377 richness. *Ecography*, 41(7), 1147-1160.
- 378 Crump, M. L. (2015). Anuran reproductive modes: evolving perspectives. *Journal of Herpetology*,  
379 49(1), 1-16.
- 380 dos Reis, M. & Yang, Z. (2011). Approximate likelihood calculation for Bayesian estimation of  
381 divergence times. *Molecular Biology and Evolution*, 28:2161-2172.
- 382 dos Reis, M., Inoue, J., Hasegawa, M., Asher, R. J., Donoghue, P. C., & Yang, Z. (2012).  
383 Phylogenomic datasets provide both precision and accuracy in estimating the timescale of  
384 placental mammal phylogeny. *Proceedings of the Royal Society B: Biological*  
385 *Sciences*, 279(1742), 3491-3500.
- 386 dos Reis, M., Gunnell, G. F., Barba-Montoya, J., Wilkins, A., Yang, Z., & Yoder, A. D. (2018).  
387 Using phylogenomic data to explore the effects of relaxed clocks and calibration strategies  
388 on divergence time estimation: primates as a test case. *Systematic Biology*, 67(4), 594-615.
- 389 Duellman, W. E. (1992). Reproductive strategies of frogs. *Scientific American*, 267(1), 80-87.
- 390 Esquerré, D., Donnellan, S., Brennan, I. G., Lemmon, A. R., Moriarty Lemmon, E., Zaher, H.,  
391 Grazziotin, F. G., & Keogh, J. S. (2020). Phylogenomics, biogeography, and  
392 morphometrics reveal rapid phenotypic evolution in pythons after crossing Wallace's  
393 line. *Systematic Biology*, 69(6), 1039-1051.
- 394 Feng, Y. J., Blackburn, D. C., Liang, D., Hillis, D. M., Wake, D. B., Cannatella, D. C., & Zhang,  
395 P. (2017). Phylogenomics reveals rapid, simultaneous diversification of three major clades  
396 of Gondwanan frogs at the Cretaceous–Paleogene boundary. *Proceedings of the national*  
397 *Academy of Sciences*, 114(29), E5864-E5870.

AUSTRALIAN FROG PHYLOGENOMICS

- 398 Georges, A., Birrell, J., Saint, K. M., McCord, W. P., & Donnellan, S. C. (1999). A phylogeny for  
399 side-necked turtles (Chelonia: Pleurodira) based on mitochondrial and nuclear gene  
400 sequence variation. *Biological Journal of the Linnean Society*, 67(2), 213-246.
- 401 Hall, R. (2002). Cenozoic geological and plate tectonic evolution of SE Asia and the SW Pacific:  
402 computer-based reconstructions, model and animations. *Journal of Asian Earth Sciences*,  
403 20(4), 353-431.
- 404 Heinicke, M. P., Greenbaum, E., Jackman, T. R., & Bauer, A. M. (2011). Phylogeny of a trans-  
405 Wallacean radiation (Squamata, Gekkonidae, *Gehyra*) supports a single early colonization  
406 of Australia. *Zoologica Scripta*, 40(6), 584-602.
- 407 Hime, P. M., Lemmon, A. R., Lemmon, E. M., Prendini, E., Brown, J. M., Thomson, R. C., Kratovil,  
408 J. D., Noonan, B. P., Pyron, R. A., Peloso, P. L V, Kortyna, M. L., Keogh, J. S., Donnellan,  
409 S. C., Mueller, R. L., Raxworthy, C. J., Kunte, K., Ron, S. R., Das, S., Gaitonde, N., Green,  
410 D. M., Labisko, J., Che, J., & Weisrock, D. W. (2021). Phylogenomics reveals ancient gene  
411 tree discordance in the amphibian tree of life. *Systematic Biology*, 70(1), 49-66.
- 412 Hoskin, C. J., & Aland, K. (2011). Two new frog species (Microhylidae: *Cophixalus*) from boulder  
413 habitats on Cape York Peninsula, north-east Australia. *Zootaxa*, 3027(1), 39-51.
- 414 Hoskin, C. J. (2013). A new frog species (Microhylidae: *Cophixalus*) from boulder-pile habitat of  
415 Cape Melville, north-east Australia. *Zootaxa*, 3722, 61-72.
- 416 Kalyaanamoorthy, S., Minh, B. Q., Wong, T. K., Von Haeseler, A., & Jermin, L. S. (2017).  
417 ModelFinder: fast model selection for accurate phylogenetic estimates. *Nature methods*,  
418 14(6), 587-589.
- 419 Katoh, K., & Standley, D. M. (2013). MAFFT multiple sequence alignment software version 7:  
420 improvements in performance and usability. *Molecular biology and evolution*, 30(4), 772-  
421 780.
- 422 Keogh, J. S. (1998). Molecular phylogeny of elapid snakes and a consideration of their  
423 biogeographic history. *Biological journal of the Linnean Society*, 63(2), 177-203.
- 424 Landis, M. J. (2017). Biogeographic dating of speciation times using paleogeographically  
425 informed processes. *Systematic Biology*, 66(2), 128-144.
- 426 Lemmon, A. R., Emme, S. A., & Lemmon, E. M. (2012). Anchored hybrid enrichment for  
427 massively high-throughput phylogenomics. *Systematic Biology*, 61(5), 727-744.
- 428 Linkem, C. W., Minin, V. N., & Leaché, A. D. (2016). Detecting the anomaly zone in species trees  
429 and evidence for a misleading signal in higher-level skink phylogeny (Squamata:  
430 Scincidae). *Systematic biology*, 65(3), 465-477.
- 431 Macphail, M. K., & Hill, R. S. (2018). What was the vegetation in northwest Australia during the  
432 Paleogene, 66–23 million years ago? *Australian Journal of Botany*, 66(7), 556-574.
- 433 Mao, X., & Retallack, G. (2019). Late Miocene drying of central Australia. *Palaeogeography*,  
434 *Palaeoclimatology, Palaeoecology*, 514, 292-304.
- 435 Marki, P. Z., Jönsson, K. A., Irestedt, M., Nguyen, J. M., Rahbek, C., & Fjeldså, J. (2017).  
436 Supermatrix phylogeny and biogeography of the Australasian Meliphagides radiation  
437 (Aves: Passeriformes). *Molecular phylogenetics and Evolution*, 107, 516-529.
- 438 Matzke, N. J. (2014). Model selection in historical biogeography reveals that founder-event  
439 speciation is a crucial process in island clades. *Systematic biology*, 63(6), 951-970.
- 440 Minh, B. Q., Nguyen, M. A. T., & von Haeseler, A. (2013). Ultrafast approximation for  
441 phylogenetic bootstrap. *Molecular Biology and Evolution*, 30(5), 1188-1195.

- 442 Mitchell, K. J., Pratt, R. C., Watson, L. N., Gibb, G. C., Llamas, B., Kasper, M., ... & Cooper, A.  
443 (2014). Molecular phylogeny, biogeography, and habitat preference evolution of  
444 marsupials. *Molecular biology and evolution*, 31(9), 2322-2330.
- 445 Morgan, M. J., Roberts, J. D., & Keogh, J. S. (2007). Molecular phylogenetic dating supports an  
446 ancient endemic speciation model in Australia's biodiversity hotspot. *Molecular*  
447 *Phylogenetics and Evolution*, 44(1), 371-385.
- 448 Mörs, T., Reguero, M., Vasylyan, D., (2020). First fossil frog from Antarctica: implications for  
449 Eocene high latitude climate conditions and Gondwanan cosmopolitanism of  
450 Australobatrachia. *Scientific Reports* 10, 5051.
- 451 Nicoli, L., Muzzopappa, P., Espinoza, N., & Melchor, R. (2022). A new fossil species of  
452 *Calyptocephalella* (Anura: Australobatrachia) from the Miocene of northern Patagonia:  
453 Novel evidence of the broad past diversity of the genus. *Journal of South American Earth*  
454 *Sciences*, 119, 104008.
- 455 Novikova, P. Y., Brennan, I. G., Booker, W., Mahony, M., Doughty, P., Lemmon, A. R., Lemmon,  
456 E. M., Roberts, J. D., Yant, L., Van de Peer, Y., Keogh, J. S. & Donnellan, S. C. (2020).  
457 Polyploidy breaks speciation barriers in Australian burrowing frogs *Neobatrachus*. *PLoS*  
458 *genetics*, 16(5), e1008769.
- 459 Nguyen, L. T., Schmidt, H. A., Von Haeseler, A., & Minh, B. Q. (2015). IQ-TREE: a fast and  
460 effective stochastic algorithm for estimating maximum-likelihood phylogenies. *Molecular*  
461 *biology and evolution*, 32(1), 268-274.
- 462 Oliver, L. A., Prendini, E., Kraus, F., & Raxworthy, C. J. (2015). Systematics and biogeography  
463 of the *Hylarana* frog (Anura: Ranidae) radiation across tropical Australasia, Southeast Asia,  
464 and Africa. *Molecular Phylogenetics and Evolution*, 90, 176-192.
- 465 Oliver, P. M., Heiniger, H., Hugall, A. F., Joseph, L., & Mitchell, K. J. (2020). Oligocene  
466 divergence of frogmouth birds (Podargidae) across Wallace's Line. *Biology Letters*, 16(5),  
467 20200040.
- 468 Palazzesi, L., Barreda, V., (2007). Major vegetation trends in the Tertiary of Patagonia  
469 (Argentina): a qualitative paleoclimatic approach based on palynological evidence. *Flora-*  
470 *Morphol. Distrib. Funct. Ecol. Plants* 202, 328–337.
- 471 Pavón-Vázquez, C. J., Brennan, I. G., Skeels, A., & Keogh, J. S. (2022). Competition and  
472 geography underlie speciation and morphological evolution in Indo-Australasian monitor  
473 lizards. *Evolution*, 76(3), 476-495.
- 474 Powney, G. D., Grenyer, R., Orme, C. D. L., Owens, I. P. F., & Meiri, S. (2010). Hot, dry and  
475 different: Australian lizard richness is unlike that of mammals, amphibians and birds.  
476 *Global Ecology and Biogeography*, 19(3), 386-396.
- 477 Pross J, Contreras L, Bijl PK, Greenwood DR, Bohaty SM, Schouten S, Bendle JA, Röhl U, Tauxe  
478 L, Raine JJ, Huck CE, van de Flierdt T, Jamieson SSR, Stickley CE, van de Schootbrugge  
479 B, Escutia C, Brinkhuis H Integrated Ocean Drilling Program Expedition 318 Scientists.  
480 (2012). Persistent near-tropical warmth on the Antarctic continent during the early Eocene  
481 epoch. *Nature* 488, 73–77.
- 482 Pyron, R. A. (2014). Biogeographic analysis reveals ancient continental vicariance and recent  
483 oceanic dispersal in amphibians. *Systematic Biology*, 63(5), 779-797.
- 484 Rabosky, D. L., Slater, G. J., & Alfaro, M. E. (2012). Clade age and species richness are decoupled  
485 across the eukaryotic tree of life. *PLoS Biology*,
- 486 Rannala, B., Yang, Z. (2007) Inferring speciation times under an episodic molecular clock.  
487 *Systematic Biology*, 56:453-466. Sherratt, E., Vidal-García, M., Anstis, M., & Keogh, J. S.



AUSTRALIAN FROG PHYLOGENOMICS

- 488 (2017). Adult frogs and tadpoles have different macroevolutionary patterns across the  
489 Australian continent. *Nature Ecology & Evolution*, 1(9), 1385-1391.
- 490 Reilly, S. B., Arifin, U., Stubbs, A. L., Karin, B. R., Kaiser, H., Frederick, J. H., Arida, E., Iskandar,  
491 D. T., McGuire, J. A. (2022). Phylogenetic relationships of southern Wallacean ranid frogs  
492 (Anura: Ranidae: *Hylarana*). *Zootaxa*, 5150(4), 591-599.
- 493 Roycroft, E. J., Moussalli, A., & Rowe, K. C. (2020). Phylogenomics uncovers confidence and  
494 conflict in the rapid radiation of Australo-Papuan rodents. *Systematic Biology*, 69(3), 431-  
495 444.
- 496 Schweizer, M., Seehausen, O., & Hertwig, S. T. (2011). Macroevolutionary patterns in the  
497 diversification of parrots: effects of climate change, geological events and key  
498 innovations. *Journal of Biogeography*, 38(11), 2176-2194.
- 499 Sherratt, E., Anstis, M., & Keogh, J. S. (2018). Ecomorphological diversity of Australian tadpoles.  
500 *Ecology and evolution*, 8(24), 12929-12939.
- 501 Skinner, A., Hugall, A. F., & Hutchinson, M. N. (2011). Lygosomine phylogeny and the origins  
502 of Australian scincid lizards. *Journal of Biogeography*, 38(6), 1044-1058.
- 503 Streicher, J. W., Miller, E. C., Guerrero, P. C., Correa, C., Ortiz, J. C., Crawford, A. J., Pie, M. R.,  
504 & Wiens, J. J. (2018). Evaluating methods for phylogenomic analyses, and a new  
505 phylogeny for a major frog clade (Hylaoidea) based on 2214 loci. *Molecular Phylogenetics*  
506 *and Evolution*, 119, 128-143.
- 507 Streicher, J. W., Loader, S. P., Varela-Jaramillo, A., Montoya, P., & de Sá, R. O. (2020). Analysis  
508 of ultraconserved elements supports African origins of narrow-mouthed frogs. *Molecular*  
509 *Phylogenetics and Evolution*, 146, 106771.
- 510 Tallowin, O. J., Meiri, S., Donnellan, S. C., Richards, S. J., Austin, C. C., & Oliver, P. M. (2020).  
511 The other side of the Sahulian coin: biogeography and evolution of Melanesian forest  
512 dragons (Agamidae). *Biological Journal of the Linnean Society*, 129(1), 99-113.
- 513 Toumoulin, A., Donnadieu, Y., Ladant, JB, Batenburg, SJ, Poblete, F., & Dupont, Nivet, G.  
514 (2020). Quantifying the effect of the Drake Passage opening on the Eocene Ocean.  
515 *Paleoceanography and Paleoclimatology*, 35(8), e2020PA003889.
- 516 Tsang, S. M., Wiantoro, S., Veluz, M. J., Sugita, N., Nguyen, Y. L., Simmons, N. B., & Lohman,  
517 D. J. (2020). Dispersal out of Wallacea spurs diversification of Pteropus flying foxes, the  
518 world's largest bats (Mammalia: Chiroptera). *Journal of Biogeography*, 47(2), 527-537.
- 519 Tyler, M. J. (1998). *Australian frogs: a natural history*. Cornell University Press.
- 520 van Beurden, E. K. (1980). Energy Metabolism of Dormant Australian Water-Holding Frogs  
521 (*Cyclorana platycephalus*). *Copeia*, 1980(4), 787-799.
- 522 Van Den Ende, C., White, L. T., & van Welzen, P. C. (2017). The existence and break-up of the  
523 Antarctic land bridge as indicated by both amphi-Pacific distributions and tectonics.  
524 *Gondwana Research*, 44, 219-227.
- 525 Vidal-García, M., Byrne, P. G., Roberts, J. D., & Keogh, J. S. (2014). The role of phylogeny and  
526 ecology in shaping morphology in 21 genera and 127 species of Australo-Papuan  
527 myobatrachid frogs. *Journal of Evolutionary Biology*, 27(1), 181-192.
- 528 Vidal-García, M., & Keogh, J. S. (2015). Convergent evolution across the Australian continent:  
529 ecotype diversification drives morphological convergence in two distantly related clades  
530 of Australian frogs. *Journal of Evolutionary Biology*, 28(12), 2136-2151.
- 531 Wiens, J. J. (2011). The causes of species richness patterns across space, time, and clades and the  
532 role of “ecological limits”. *The Quarterly review of biology*, 86(2), 75-96.

Brennan et al.

533 Zhang, C., Rabiee, M., Sayyari, E., & Mirarab, S. (2018). ASTRAL-III: polynomial time species  
534 tree reconstruction from partially resolved gene trees. *BMC bioinformatics*, 19(6), 15-30.

## AUSTRALIAN FROG PHYLOGENOMICS

### 535 *Figure Captions*

536 Figure 1. Australian frogs show an imbalance in species richness, age, and geographic spread.  
537 Above, maps of richness for the three focal radiations (with Limnodynastidae and Myobatrachidae  
538 presented together as Myobatrachoidea) represent visually how contemporary patterns of frog  
539 richness reflect water availability, and are highest in the wet temperate, subtropical, and tropical  
540 rainforests of the east coast. We show annual precipitation here for ease of interpretation but  
541 Australian frog richness is potentially better explained by actual evapotranspiration (Coops et al.  
542 2018). Species occurrence records were collated from the Atlas of Living Australia  
543 (<https://ala.org.au>). Below, Australian radiations can be divided broadly into (1) relictual  
544 Gondwanan clades >40 myo (green), (2) ancient colonizing groups (>20 myo, <40 myo; varied  
545 colors), or (3) immigrant clades of Asian origin (orange). Each point is colored according to the  
546 region of hypothesized origin and labeled by the narrowest phylogenetic taxonomy. Black labels  
547 indicate focal groups and grey labels indicate other Australian vertebrate clades. Regression in  
548 background is fit to all points with the exception of Limnodynastidae and Myobatrachidae  
549 (included jointly as Myobatrachoidea) and shows a general pattern of increasing species richness  
550 with age. This pattern holds equally for a regression of just frog clades ( $R^2=0.849$ , intercept=1.827,  
551 slope=1.805,  $p=0.016$ ).

552  
553 Figure 2. Time-calibrated frog phylogeny highlights the varied origins and staggered arrival of the  
554 four major frog families that comprise the Australian anuran fauna. Primarily Australian clades  
555 are identified by black branches and text, their closest living relatives outside of Australia are noted  
556 by colored branches and text, and outgroup taxa are grey. White circles at nodes identify the  
557 location of fossil calibrations (see Table S2). Upper inset map shows the general geographic  
558 location of: (red) closely related microhylids in New Guinea, (purple) phyllomedusid hylids in  
559 South America, and (dark blue) *Calyptocephallela* in Chile. Lower inset maps show the connection  
560 and proximity of Australia to other Gondwanan continents as Australia drifted away over the past  
561 100 million years. White indicates contemporary coastlines, light blue the continental plates, and  
562 dark blue the oceans. Maps were generated using GPlates and input files modified from Landis  
563 (2017). Partial fan phylogeny was plotted using *phytools* in the R programming environment.  
564 Annotations on vertical time axis show the age of crown divergences of other notable Australian  
565 groups for temporal context (see Fig.1). Species illustrated clockwise from top left: *Cophixalus*  
566 *infacetus*, *Austrochaperina robusta*, *Litoria fallax*, *Litoria dahliei*, *Litoria xanthomera*,  
567 *Myobatrachus gouldii*, *Spicospina flammocaerulea*, *Taudactylus acutirostris*, *Mixophyes balbus*,  
568 *Notaden bennettii*.

569  
570 Figure 3. Simplified biogeographic history of Australian frogs with a focus on the range  
571 reconstruction of their immediate ancestors (complete figure in Fig.S7). Ranges have been  
572 estimated under the preferred model DEC+ $j$ + $x$ + $w$  supporting Hypothesis 1 (Antarctic dispersal of  
573 Pelodyadidae frogs; pink arrow on tree indicates ancestral pelodyadid constrained to Antarctica)  
574 in *BioGeoBEARS*. Pie charts represent range probability at nodes with colors corresponding to  
575 inset map. Circular world maps show geological reconstructions at relevant time points, with  
576 numbers mapped to nodes of interest. Colored arrows indicate hypothesized dispersal paths for  
577 each clade. Under this biogeographic model the ancestors of both the Myobatrachoidea and  
578 Pelodyadidae lived in South America, and Australo-Papuan microhylids (Asterophryinae)  
579 originate from an Asian ancestor. The most likely dispersal path for the Pelodyadidae included  
580 expansion across Antarctica after divergence from the Phyllomedusidae. Phylogeny plotted with

581 *phytools*, maps generated by the Ocean Drilling Stratigraphic Network  
582 (<https://www.odsn.de/odsn/services/paleomap/paleomap.html>).

583

584 *Supplementary Materials and Methods*

585

586 Data available from the Dryad Digital Repository: [http://dx.doi.org/10.5061/dryad.\[NNNN\]](http://dx.doi.org/10.5061/dryad.[NNNN])

587 and from the GitHub repository: [https://github.com/IanGBrennan/Crown\\_Frogs](https://github.com/IanGBrennan/Crown_Frogs)

588

589 *Developing Figure 1*

590 Figure 1 aims to provide background on the richness and spatial distribution of the focal  
591 frog clades, alongside evolutionary context for the accumulation of vertebrate biodiversity on the  
592 Australian continent. Neither the top or bottom visualizations are intended to provide an  
593 explanation of the *processes* dictating Australian vertebrate diversity. Instead they are  
594 visualizations of the *patterns* of contemporary Australian vertebrate diversity.

595 We downloaded Australian annual rainfall data from NASA using the R package  
596 *nasapower*, and combined this with species occurrence records downloaded from the Atlas of  
597 Living Australia. Annual rainfall is an easily interpretable measure of water availability in an  
598 environment, and as such provides a reflection of habitat suitability for frogs. However, we  
599 acknowledge that composite environmental variables such as actual evapotranspiration (AET) may  
600 be a better predictor of contemporary frog richness patterns (Powney et al., 2010; Coops et al.,  
601 2018).

602 To plot the relationship between clade age and richness of Australian terrestrial vertebrates  
603 we collected data from all available non-nested (each clade is only represented once) clades from  
604 the literature. Data are compiled in the supplement *Comparative\_Radiations.csv* and can be plotted  
605 using the script *Comparative\_Radiations.R*. We also incorporated information where available  
606 about the biogeographic origin of each group to visualize the contrast between young clades from  
607 Asia and old Gondwanan groups. The included regression helps to visualize an interesting *pattern*  
608 in the data: species richness increases with clade age. However, we do not present this as an  
609 evolutionary explanation for varied richness among Australian terrestrial vertebrate groups.

610

611 *Sequence Identity*

612 To confirm sequence identity we downloaded a fasta file of *Xenopus* genes from Ensembl  
613 (UCB\_Xtro\_10.0) and used *metablast* to do a reciprocal blast against the Anchored Hybrid  
614 Enrichment loci. Of the 450 loci, 390 matched to *Xenopus* exons, and the remainder to intronic  
615 and flanking sequences (see *RBH\_AHE\_Xenopus.csv* in Supplementary Material for list).  
616 Downstream divergence time analysis relied on partitioning loci by codon position and so only  
617 exonic targets were retained for this exercise. AHE exons are listed under the column *query\_id*  
618 and *Xenopus* matches under *subject\_id* with gene name indicated by *subject\_id\_name*.

619

620 *Phylogenetics*

621 Phylogeny reconstruction in the era of phylogenomics has simultaneously resolved many  
622 longstanding systematic questions and instigated new ones. The search for the most accurate  
623 species tree has reignited debates about concatenation versus coalescent methods and their pros  
624 and cons. Here we address two common issues resulting in phylogenetic error: incomplete lineage  
625 sorting (ILS) and rate variation among lineages and sites (heterotachy). Identifying and modelling  
626 heterotachy generally requires long alignments to accurately model rate variation, so most methods

## AUSTRALIAN FROG PHYLOGENOMICS

627 rely on concatenated sequence alignments. Because of the ancient age of our focal group and sparse  
628 sampling among major groups we risk biases due to heterotachy. To estimate a species tree from  
629 our concatenated alignment we used the General Heterogeneous evolution On a Single Topology  
630 (GHOST) method. GHOST is implemented in IQTREE and requires a user specified number of  
631 mixture (rate) classes and model. We separately fit unlinked GTR models with 2—5 mixture  
632 classes (e.g.:  $-m\ GTR*H4$ ). AIC comparison identified the 4-class model as preferred ( $H*2$  AICc  
633 = 13754122;  $H*3$  AICc = 13604562;  $H*4$  AICc = 13500200;  $H*5$  AICc = 13523685).

634 Concatenation methods are however expected to perform poorly when the true branching  
635 pattern includes nested rapid divergence events. In this case high rates of ILS may bias  
636 phylogenetic signal, trapping concatenation in the anomaly zone. To counter this we estimated a  
637 species tree using ASTRAL with IQTREE genetrees as input.  
638

### 639 *Biogeography*

640 To assess the biogeographic history of Australian frogs we combined our phylogenetic hypothesis  
641 with known fossil information and reconstructed ancestral ranges in *BioGeoBEARS* (Matzke  
642 2014). We started by dividing the geographic distribution of our sampled taxa into eight discrete  
643 areas that (1) summarize the general biogeographic history of frogs, (2) are relevant to our  
644 sampling and questions, and (3) make sense on a geological timescale with reference to plate  
645 tectonics over the last 220 million years. These areas correspond to Africa, Asia (excluding the  
646 Indian subcontinent), Australo-Papua, Europe, Madagascar, North America, South America, and  
647 Antarctica. For single tips that represent a genus or subfamily we coded their geographic range  
648 accordingly, however this never resulted in an overrepresentation of areas that might inflate  
649 dispersal estimates. Our primary objective was to identify the ancestral distributions of each  
650 Australian frog clade to provide an estimate of their origins.

651 While Antarctica seems a strange inclusion in our discrete bioregions owing to its current  
652 climate and lack of frogs, a recent discovery has identified the continent's first anuran (Mörs et al.  
653 2020). This information is vital to our understanding of the connectivity of the Gondwanan  
654 supercontinent as well as the biogeographic history of Australian frogs. To incorporate this sample  
655 we added a tip to our tree with an appropriate estimated age following Mörs et al. (2020). Due to  
656 our limited sampling of extant Calyptocephalellidae however, the addition of this taxon  
657 dramatically imbalances range reconstruction. To correct for this and account for the ancient  
658 known history of calyptocephalellids in South America (Moura et al. 2021; Nicoli et al. 2022) we  
659 included two additional South American fossil taxa, one younger—*Calyptocephalella canqueli*  
660 (following Muzzopappa & Báez 2009) and one older—*Calyptocephalella satan* (following Nicoli  
661 et al. 2022). Note, here we consider *C.satan* as interchangeable with the similarly aged  
662 *Baurubatrachus pricei* (following Báez & Gómez 2018), being representative of a broader extinct  
663 South American calyptocephalellid diversity (Nicoli et al. 2022). While the taxonomy and  
664 phylogenetic relationships of extant (*Calyptocephalella gayi*, *Telmatobufo spp.*) and extinct (*C.*  
665 *canqueli*, *C. satan*, *et al.*) calyptocephalellids is unresolved, we believe this sampling strategy is an  
666 appropriate solution for the question at hand.

667 In addition to the origins of Australian frogs we were interested in identifying how  
668 pelodryadids arrived in Australia. Specifically we aimed to test if they arrived via dispersal through  
669 Antarctica or overwater dispersal from South America. To test these hypotheses we added an  
670 ancestor (*Pelodryadidae\_Ancessor*) to our tree along the stem leading to the Pelodryadidae.  
671 *BioGeoBEARS* accommodates sampled ancestors as “hooks”, which are represented by a non-  
672 zero terminal edge length shorter than an arbitrary threshold (here: 0.000001 million years). This



673 allowed us to force the ancestral pelodryadid to either have had a range in Antarctica (Hypothesis  
674 1; H1; South America→Antarctica→Australia), or have remained in South America prior to an  
675 overwater dispersal event (Hypothesis 2; H2; South America→Australia).

676 The biogeographic history of frogs has played out on a very long timescale (>200 million  
677 years) and across continents that have moved dramatically relative to one another. To capture the  
678 complex interplay of plate tectonics and biogeography we incorporated several elements that might  
679 make this scenario more realistic. We first divided the anuran tree into six equal slices of 30 million  
680 years (0—30, 30—60, ... 150—180) and one slice of 40 million years (180—220). At the upper  
681 bound of each time slice (30, 60 ... 180, 220) we then reconstructed continental positions in  
682 GPlates following Landis (2017) and extracted pairwise distances (in km) among areas from the  
683 closest points of two areas, using the measuring tool in GPlates. Additionally, we characterized  
684 regions as (a) in contact with one another, (b) separated by ocean, or (c) separated by another  
685 landmass. We used the area distances through time to construct distance matrices following Van  
686 Dam & Matzke (2016), and the area adjacency information to construct dispersal matrices.

687 Constructing these time-specific matrices allowed us to compare a set of scenarios that  
688 include the traditional DEC model (Dispersal Extinction Cladogenesis), DEC+j which allows  
689 jumps in range expansion (range discontinuity), DEC+x which estimates a parameter  $x$   
690 corresponding to a correction for dispersal probability as a function of distance between areas  
691 (dispersal \* relative\_distance <sup>$x$</sup> ), DEC+j+x which allows jumps and corrects for distance among  
692 areas, DEC+x+w which estimates  $x$  (correcting for distance) in addition to a parameter  $w$  which  
693 can be interpreted as correcting for different levels of area adjacency (dispersal \*  
694 dispersal\_multiplier <sup>$w$</sup> ), and finally DEC+j+x+w which can be interpreted as allowing for jumps  
695 in range expansion ( $j$ ) while correcting for geographic distance between areas ( $x$ ) and types of  
696 adjacency/separation ( $w$ ). Ultimately the most complex model (DEC+j+x+w) is an attempt to  
697 account for differences in the geographic distance between areas ( $x$ ) as well as what separates them  
698 ( $w$ ), through time, while allowing taxa to make rapid dispersal events ( $j$ ). Estimating  $w$   
699 unfortunately necessitates the manual input of dispersal multipliers which scale dispersal  
700 probability, however these are ultimately corrected by estimating their relationship via  $w$ . We  
701 established conservative manual dispersal multipliers for adjacent areas (1), areas split by another  
702 contiguous landmass (0.5), and areas split by ocean (0.25). Finally, we fit all six models to both  
703 the H1 and H2 datasets. We compared models by calculating AIC values, delta AIC against the  
704 best fit, and AIC weights as the relative contribution to the pool of models.

705

AUSTRALIAN FROG PHYLOGENOMICS

706 Table S1. Taxon sampling for this project.

| Geography        | Superfamily/Clade | Family               | Subfamily       | Genus species                     | Registration  |
|------------------|-------------------|----------------------|-----------------|-----------------------------------|---------------|
| Outgroup         | Pipoidea          | Pipidae              | —               | <i>Xenopus tropicalis</i>         | NCBI Genome   |
| Outgroup         | Pipoidea          | Pipidae              | —               | <i>Pipidae Pipa pipa</i>          | MVZ 247511    |
| Outgroup         | Pipoidea          | Rhinophrynidae       | —               | <i>Rhinophrynus dorsalis</i>      | MVZ 164756    |
| Outgroup         | Leiopelmatoidea   | Ascaphidae           | —               | <i>Ascaphus montanus</i>          | REF AscMon    |
| Outgroup         | Discoglossoidea   | Bombinatoridae       | —               | <i>Bombina microdeladigitora</i>  | CAS 242112    |
| Outgroup         | Discoglossoidea   | Alytidae             | —               | <i>Alytes obstetricans</i>        | MVZ 231914    |
| Outgroup         | Pelobatoidea      | Scaphiopodidae       | —               | <i>Spea hammondii</i>             | MVZ 145187    |
| Outgroup         | Pelobatoidea      | Pelodytidae          | —               | <i>Pelodytes ibericus</i>         | MVZ 186009    |
| Outgroup         | Pelobatoidea      | Megophryidae         | —               | <i>Leptolalax bourreti</i>        | AMCC 106489   |
| Outgroup         | Pelobatoidea      | Pelobatidae          | —               | <i>Pelobates syriacus</i>         | MVZ 234650    |
| Outgroup         | —                 | Heleophrynidae       | —               | <i>Heleophryne purcelli</i>       | SANBI 1954    |
| Outgroup         | Ranoidea          | Ptychadenidae        | —               | <i>Ptychadena mascareniensis</i>  | ESP/CJR R1068 |
| Outgroup         | Ranoidea          | Phrynobatrachidae    | —               | <i>Phrynobatrachus keniensis</i>  | MVZ 226261    |
| Outgroup         | Ranoidea          | Microhylidae         | Phrynomatinae   | <i>Phrynomantis annectens</i>     | ESP/CJR R1330 |
| Outgroup         | Ranoidea          | Microhylidae         | Otophryinae     | <i>Otophryne robusta</i>          | PLVP PT459    |
| Outgroup         | Ranoidea          | Microhylidae         | Gastrophryinae  | <i>Stereocyclops incrassatus</i>  | PLVP PT273    |
| Outgroup         | Ranoidea          | Microhylidae         | Scaphiophryinae | <i>Scaphiophryne brevis</i>       | PLVP PT312    |
| Outgroup         | Ranoidea          | Microhylidae         | Cophylinae      | <i>Plethodontohyla notosticta</i> | AMCC 128714   |
| Outgroup         | Ranoidea          | Microhylidae         | Kalophryinae    | <i>Kalophrynus interlineatus</i>  | ABTC 105933   |
| Outgroup         | Ranoidea          | Microhylidae         | Dyscophinae     | <i>Dyscophus guineti</i>          | MVZ 238744    |
| Outgroup         | Ranoidea          | Microhylidae         | Microhylinae    | <i>Kaloula picta</i>              | ABTC 76311    |
| Outgroup         | Ranoidea          | Microhylidae         | Microhylinae    | <i>Microhyla berdmorei</i>        | ABTC 106005   |
| Outgroup         | Ranoidea          | Microhylidae         | Asterophryinae  | <i>Liophryne rhododactyla</i>     | ABTC 49542    |
| Outgroup         | Ranoidea          | Microhylidae         | Asterophryinae  | <i>Callulops doriae</i>           | ABTC 98415    |
| Outgroup         | Ranoidea          | Microhylidae         | Asterophryinae  | <i>Hylophorbus rainerguntheri</i> | ABTC 98304    |
| Outgroup         | Ranoidea          | Microhylidae         | Asterophryinae  | <i>Genyophryne thomsoni</i>       | PLVP PT452    |
| Outgroup         | Ranoidea          | Microhylidae         | Asterophryinae  | <i>Barygenys flavigularis</i>     | PLVP PT439    |
| Outgroup         | Ranoidea          | Microhylidae         | Asterophryinae  | <i>Copiula pipilans</i>           | ABTC 114698   |
| Outgroup         | Ranoidea          | Microhylidae         | Asterophryinae  | <i>Austrochaperina guttata</i>    | ABTC 141506   |
| Australian Clade | Ranoidea          | Microhylidae         | Asterophryinae  | <i>Austrochaperina gracilipes</i> | ABTC 79186    |
| Australian Clade | Ranoidea          | Microhylidae         | Asterophryinae  | <i>Austrochaperina robusta</i>    | conx5153      |
| Outgroup         | Ranoidea          | Microhylidae         | Asterophryinae  | <i>Oreophryne brachypus</i>       | ABTC 104804   |
| Outgroup         | Ranoidea          | Microhylidae         | Asterophryinae  | <i>Aphantophryne pansa</i>        | ABTC 49605    |
| Outgroup         | Ranoidea          | Microhylidae         | Asterophryinae  | <i>Cophixalus parkeri</i>         | ABTC 49557    |
| Outgroup         | Ranoidea          | Microhylidae         | Asterophryinae  | <i>Cophixalus balbus</i>          | ABTC 114884   |
| Outgroup         | Ranoidea          | Microhylidae         | Asterophryinae  | <i>Cophixalus bewaniensis</i>     | ABTC 112107   |
| Australian Clade | Ranoidea          | Microhylidae         | Asterophryinae  | <i>Cophixalus crepitans</i>       | conx1112      |
| Australian Clade | Ranoidea          | Microhylidae         | Asterophryinae  | <i>Cophixalus infacetus</i>       | conx5295      |
| Australian Clade | Ranoidea          | Microhylidae         | Asterophryinae  | <i>Cophixalus hosmeri</i>         | conx5267      |
| Outgroup         | Myobatrachoidea   | Calyptocephalellidae | —               | <i>Calyptocephalella gayi</i>     | PMH 1         |
| Australian Clade | Myobatrachoidea   | Myobatrachidae       | —               | <i>Rheobatrachus silus</i>        | ABTC 7324     |
| Australian Clade | Myobatrachoidea   | Myobatrachidae       | —               | <i>Rheobatrachus vitellinus</i>   | ABTC 105698   |
| Australian Clade | Myobatrachoidea   | Myobatrachidae       | —               | <i>Mixophyes balbus</i>           | ABTC 25323    |
| Australian Clade | Myobatrachoidea   | Myobatrachidae       | —               | <i>Mixophyes hihiorlo</i>         | ABTC 45861    |
| Australian Clade | Myobatrachoidea   | Limnodynastidae      | —               | <i>Lechriodus fletcheri</i>       | ABTC 24892    |
| Australian Clade | Myobatrachoidea   | Limnodynastidae      | —               | <i>Opisthodon ornatus</i>         | ABTC 15543    |

|                  |                 |                 |                 |                                      |              |
|------------------|-----------------|-----------------|-----------------|--------------------------------------|--------------|
| Australian Clade | Myobatrachoidea | Limnodynastidae | —               | <i>Heleioporus australiacus</i>      | ABTC 67742   |
| Australian Clade | Myobatrachoidea | Limnodynastidae | —               | <i>Neobatrachus albipes</i>          | ABTC 15833   |
| Australian Clade | Myobatrachoidea | Limnodynastidae | —               | <i>Notaden nichollsi</i>             | ABTC 15833   |
| Australian Clade | Myobatrachoidea | Limnodynastidae | —               | <i>Limnodynastes dumerilii</i>       | ABTC 104299  |
| Australian Clade | Myobatrachoidea | Limnodynastidae | —               | <i>Philoria sphagnicola</i>          | ABTC 25832   |
| Australian Clade | Myobatrachoidea | Limnodynastidae | —               | <i>Adelotus brevis</i>               | ABTC 24210   |
| Australian Clade | Myobatrachoidea | Myobatrachidae  | —               | <i>Taudactylus liemi</i>             | ABTC 50947   |
| Australian Clade | Myobatrachoidea | Myobatrachidae  | —               | <i>Paracrinia haswelli</i>           | ABTC 26441   |
| Australian Clade | Myobatrachoidea | Myobatrachidae  | —               | <i>Anistisia (Geocrinia) alba</i>    | ABTC 106079  |
| Australian Clade | Myobatrachoidea | Myobatrachidae  | —               | <i>Assa darlingtoni</i>              | ABTC 136278  |
| Australian Clade | Myobatrachoidea | Myobatrachidae  | —               | <i>Crinia (Bryobatrachus) nimbus</i> | ABTC 25297   |
| Australian Clade | Myobatrachoidea | Myobatrachidae  | —               | <i>Crinia signifera</i>              | ABTC 25676   |
| Australian Clade | Myobatrachoidea | Myobatrachidae  | —               | <i>Spicospina flammocaerulea</i>     | ABTC 144371  |
| Australian Clade | Myobatrachoidea | Myobatrachidae  | —               | <i>Uperoleia laevigata</i>           | MM 1227      |
| Australian Clade | Myobatrachoidea | Myobatrachidae  | —               | <i>Pseudophryne major</i>            | ABTC 16479   |
| Australian Clade | Myobatrachoidea | Myobatrachidae  | —               | <i>Metacrinia nichollsi</i>          | ABTC 17124   |
| Australian Clade | Myobatrachoidea | Myobatrachidae  | —               | <i>Arenophryne rotunda</i>           | ABTC 114066  |
| Australian Clade | Myobatrachoidea | Myobatrachidae  | —               | <i>Myobatrachus gouldii</i>          | WAM R156759  |
| Outgroup         | Hyoidea         | Hemiphractidae  | —               | <i>Stefania evansi</i>               | BPN1286      |
| Outgroup         | Hyoidea         | Ceratophryidae  | —               | <i>Ceratophrys cornuta</i>           | MVZ 247561   |
| Outgroup         | Hyoidea         | Hylidae         | Cophomantinae   | <i>Hypsiboas crepitans</i>           | YPM 10666    |
| Outgroup         | Hyoidea         | Hylidae         | Lophohylinae    | <i>Osteopilus dominicensis</i>       | MCZA148702   |
| Outgroup         | Hyoidea         | Hylidae         | Scinaxinae      | <i>Scinax staufferi</i>              | MVZ 257781   |
| Outgroup         | Hyoidea         | Hylidae         | Pseudinae       | <i>Pseudis paradoxa</i>              | LSUMNS 12511 |
| Outgroup         | Hyoidea         | Hylidae         | Dendropsophinae | <i>Dendropsophus microcephalus</i>   | MVZ 264263   |
| Outgroup         | Hyoidea         | Hylidae         | Acrisinae       | <i>Pseudacris nigrita</i>            | REF PseNig   |
| Outgroup         | Hyoidea         | Hylidae         | Hylinae         | <i>Smilisca fodiens</i>              | YPM 014191   |
| Outgroup         | Hyoidea         | Phyllomedusidae | —               | <i>Cruziophyla calcarifer</i>        | QCAZ 48552   |
| Outgroup         | Hyoidea         | Phyllomedusidae | —               | <i>Phyllomedusa vallantii</i>        | QCAZ 48818   |
| Australian Clade | Hyoidea         | Pelodyadidae    | —               | <i>Litoria citropa</i>               | ABTC 7146    |
| Australian Clade | Hyoidea         | Pelodyadidae    | —               | <i>Litoria (Nyctimystes) dayi</i>    | ABTC 15997   |
| Australian Clade | Hyoidea         | Pelodyadidae    | —               | <i>Litoria genimaculata</i>          | ABTC 42824   |
| Australian Clade | Hyoidea         | Pelodyadidae    | —               | <i>Litoria wilcoxii</i>              | ABTC 16804   |
| Australian Clade | Hyoidea         | Pelodyadidae    | —               | <i>Litoria andiirmalin</i>           | ABTC 142651  |
| Australian Clade | Hyoidea         | Pelodyadidae    | —               | <i>Litoria xanthomera</i>            | ABTC 102385  |
| Australian Clade | Hyoidea         | Pelodyadidae    | —               | <i>Litoria gilleni</i>               | ABTC 30786   |
| Australian Clade | Hyoidea         | Pelodyadidae    | —               | <i>Litoria raniformis</i>            | ABTC 12854   |
| Australian Clade | Hyoidea         | Pelodyadidae    | —               | <i>Litoria thesaurensis</i>          | ABTC 50489   |
| Australian Clade | Hyoidea         | Pelodyadidae    | —               | <i>Litoria dahlui</i>                | ABTC 102434  |
| Australian Clade | Hyoidea         | Pelodyadidae    | —               | <i>Cyclorana cultripes</i>           | ABTC 16892   |
| Australian Clade | Hyoidea         | Pelodyadidae    | —               | <i>Litoria infrafronata</i>          | ABTC 86210   |
| Australian Clade | Hyoidea         | Pelodyadidae    | —               | <i>Litoria brevipalmata</i>          | ABTC 127632  |
| Australian Clade | Hyoidea         | Pelodyadidae    | —               | <i>Nyctimystes disrupta</i>          | ABTC 48225   |
| Australian Clade | Hyoidea         | Pelodyadidae    | —               | <i>Litoria revelata</i>              | ABTC 80814   |
| Australian Clade | Hyoidea         | Pelodyadidae    | —               | <i>Litoria burrowsi</i>              | ABTC 17631   |
| Australian Clade | Hyoidea         | Pelodyadidae    | —               | <i>Litoria tyleri</i>                | ABTC 3925    |
| Australian Clade | Hyoidea         | Pelodyadidae    | —               | <i>Litoria balatus</i>               | ABTC 100638  |
| Australian Clade | Hyoidea         | Pelodyadidae    | —               | <i>Litoria dorsalis</i>              | ABTC 79181   |

## AUSTRALIAN FROG PHYLOGENOMICS

|                  |          |              |   |                             |             |
|------------------|----------|--------------|---|-----------------------------|-------------|
| Australian Clade | Hyloidea | Pelodyadidae | — | <i>Litoria adelaidensis</i> | ABTC 28282  |
| Australian Clade | Hyloidea | Pelodyadidae | — | <i>Litoria angiana</i>      | ABTC 48210  |
| Australian Clade | Hyloidea | Pelodyadidae | — | <i>Litoria fallax</i>       | ABTC 102409 |
| Australian Clade | Hyloidea | Pelodyadidae | — | <i>Litoria tornieri</i>     | ABTC 11777  |

707

708

709 Table S2. Fossil calibrations implemented in MCMCtree analysis of frog divergence dates. Node  
 710 number (#) corresponds to nodes in supplementary figure below.  
 711

| #  | Node Calibrated                          | Fossil                                    | Minimum | Soft Max. | Source (see Feng et al. 2017) |
|----|------------------------------------------|-------------------------------------------|---------|-----------|-------------------------------|
| 1  | Anura                                    | † <i>Liaobatrachus zhaoi</i>              | 129.7   | 252       | Chang et al. (2009)           |
| 2  | Alytoidea                                | † <i>Iberobatrachus angelae</i>           | 125     | 252       | Gomez et al. (2016)           |
| 3  | Pipanura                                 | † <i>Rhadinosteus parvus</i>              | 148.1   | 252       | Cannatella (2015)             |
| 4  | Pipoidea                                 | † <i>Neusibatrachus willferti</i>         | 127.2   | 52        | Gomez et al. (2016)           |
| 5  | Pipidae                                  | † <i>Pachycentra taqueti</i>              | 83.6    | 48.1      | Cannatella (2015)             |
| 6  | Pelobatoidea                             | † <i>Elkobatrachus brocki</i>             | 46.1    | 148.1     | Henrici and Haynes (2006)     |
| 7  | Pelodytes + (Pelobatidae + Megophryidae) | † <i>Miopelodytes gilmorei</i>            | 38.9    | 148.1     | Henrici and Haynes (2006)     |
| 8  | Pelobatidae + Megophryidae               | † <i>Macropelobates osborni</i>           | 28.1    | 148.1     | Cohen et al. (2013)           |
| 9  | Acosmanura                               | † <i>Eurycephalella alcinae</i>           | 113     | 252       | Baez (2009)                   |
| 10 | Neobatrachia                             | † <i>Beelzebufo ampinga</i>               | 66      | 148.1     | Rogers et al. (2013)          |
| 11 | Myobatrachoidea                          | † <i>Calyptocephalella pichileufensis</i> | 47.5    | 48.1      | Gomez et al. (2011)           |
| 12 | Ranoidea                                 | † <i>Thamastosaurus gezei</i>             | 33.9    | 148.1     | Rage and Rocek (2007)         |
| 13 | Ptychadena + Phrynobatrachus             | <i>Ptychadenidae fossil</i>               | 25      | 148.1     | Blackburn et al. (2015)       |

712

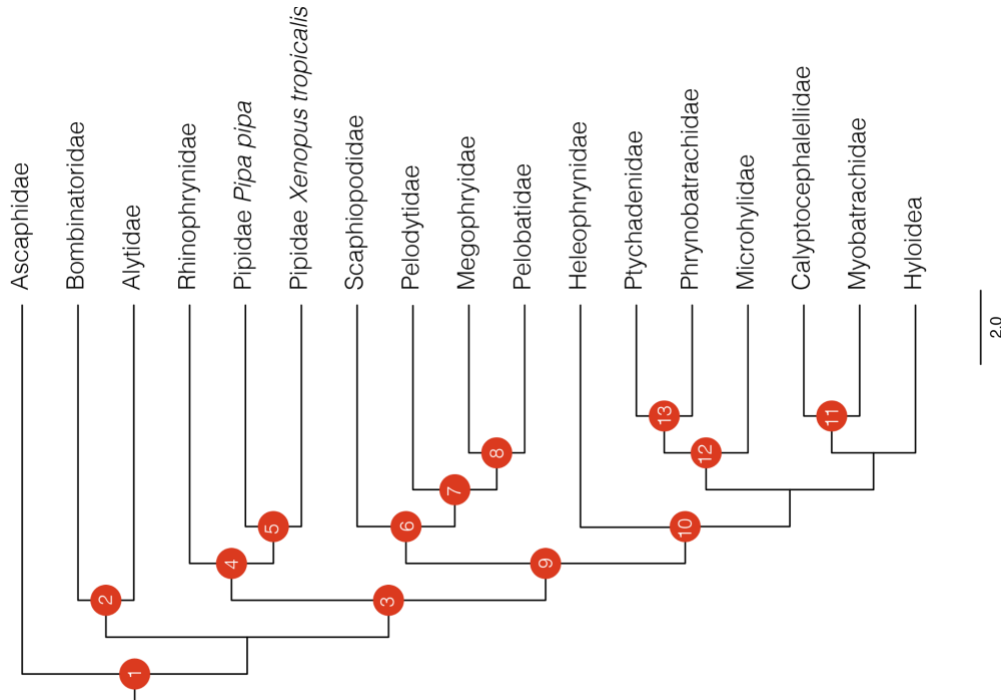

713  
 714  
 715  
 716  
 717  
 718  
 719  
 720  
 721  
 722  
 723  
 724

Table S3. Results of biogeographic ancestral range reconstruction in *BioGeoBEARS*. Hypothesis *H1* refers to the dispersal of pelodyrid frogs from South America through Antarctica to Australia, whereas *H2* refers to the over water dispersal of pelodyrid frogs from South America directly to Australia. Models are sorted according to deltaAIC scores, indicating the preferred model at the top.



## AUSTRALIAN FROG PHYLOGENOMICS

725

| Model     | Hypothesis | No. Param. | LnL     | AIC    | deltaAIC | AICw |
|-----------|------------|------------|---------|--------|----------|------|
| DEC+j+x+w | H1         | 5          | -91.47  | 192.94 | 0        | 59.7 |
| DEC+j+x   | H1         | 4          | -93.49  | 194.98 | 2.04     | 21.5 |
| DEC+j+x+w | H2         | 5          | -93.08  | 196.16 | 3.22     | 11.9 |
| DEC+j+x   | H2         | 4          | -94.66  | 197.32 | 4.38     | 6.69 |
| DEC+x+w   | H2         | 4          | -102.71 | 213.42 | 20.48    | 0    |
| DEC+j     | H2         | 3          | -104.91 | 215.82 | 22.88    | 0    |
| DEC+x+w   | H1         | 4          | -105    | 218    | 25.06    | 0    |
| DEC+x     | H2         | 3          | -106.47 | 218.94 | 26       | 0    |
| DEC+x     | H1         | 3          | -107.85 | 221.7  | 28.76    | 0    |
| DEC+j     | H1         | 3          | -109.33 | 224.66 | 31.72    | 0    |
| DEC       | H2         | 2          | -114.67 | 233.34 | 40.4     | 0    |
| DEC       | H1         | 2          | -121.56 | 247.12 | 54.18    | 0    |

726

727  
728  
729

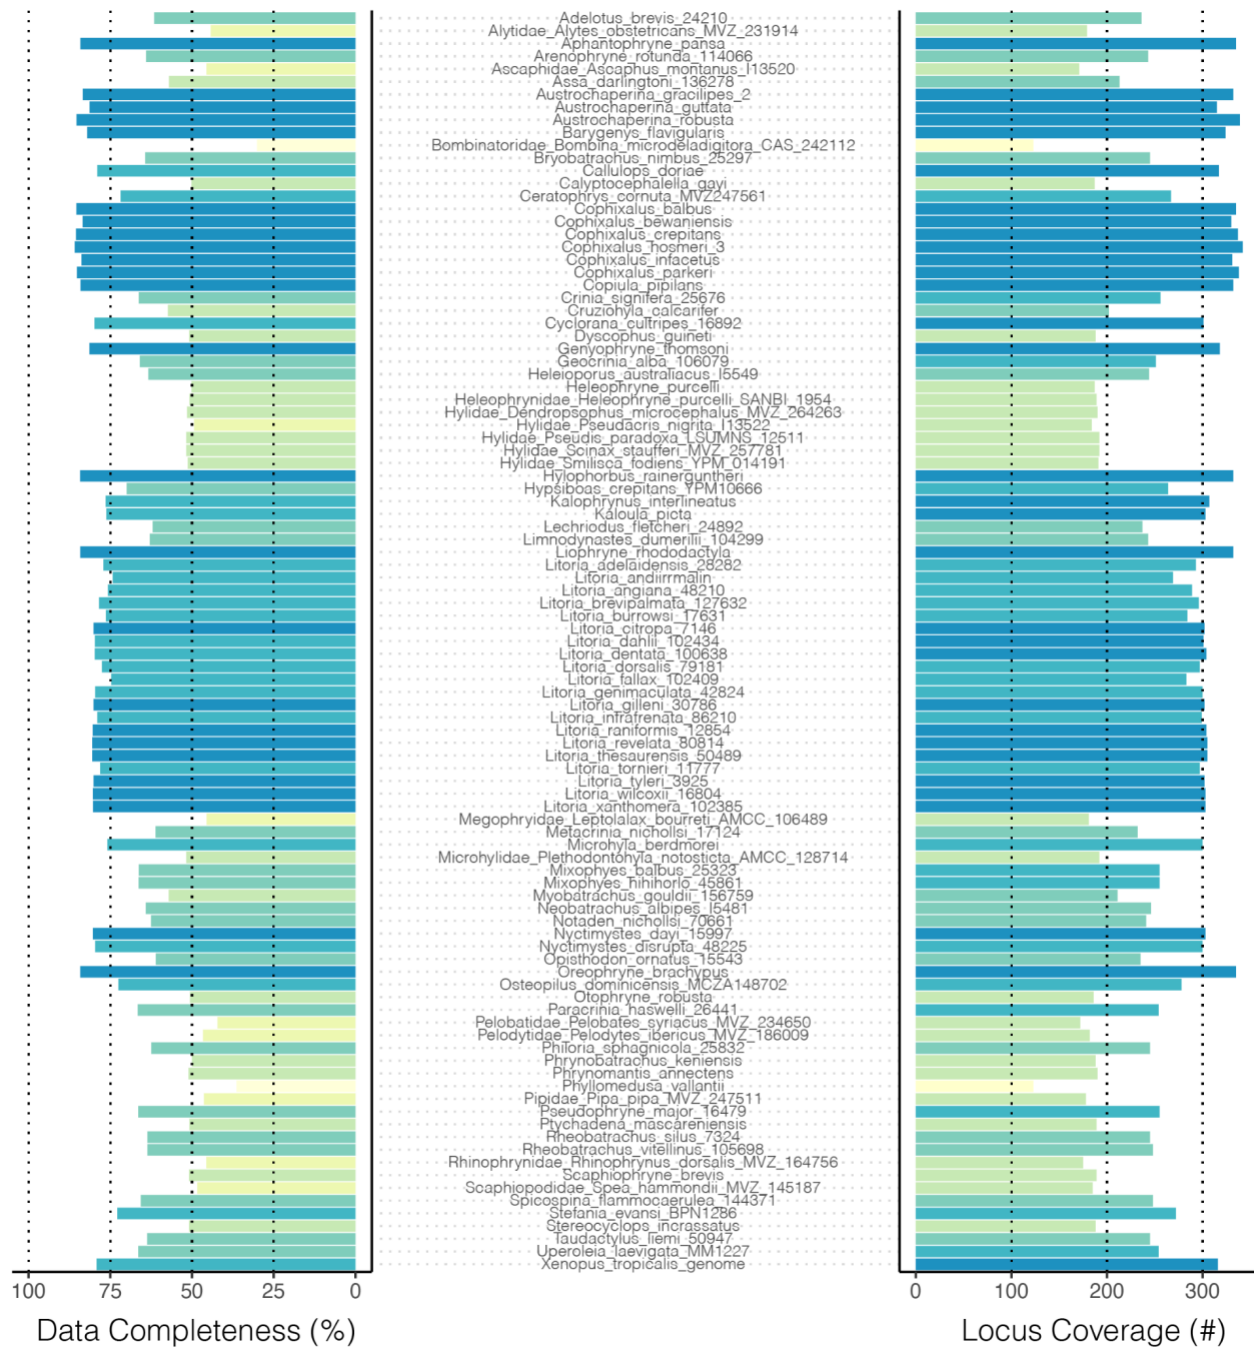

730  
731  
732  
733  
734  
735

Figure S1. Data completeness across all samples. Left histogram shows data completeness as percent of bases in total alignment (concatenated alignment length 523,036 bp) exclusive of gaps (-) and missing bases (N). Right histogram shows data completeness as the absolute number of loci included per sample, as a representation of the number of gene trees per sample.

## AUSTRALIAN FROG PHYLOGENOMICS

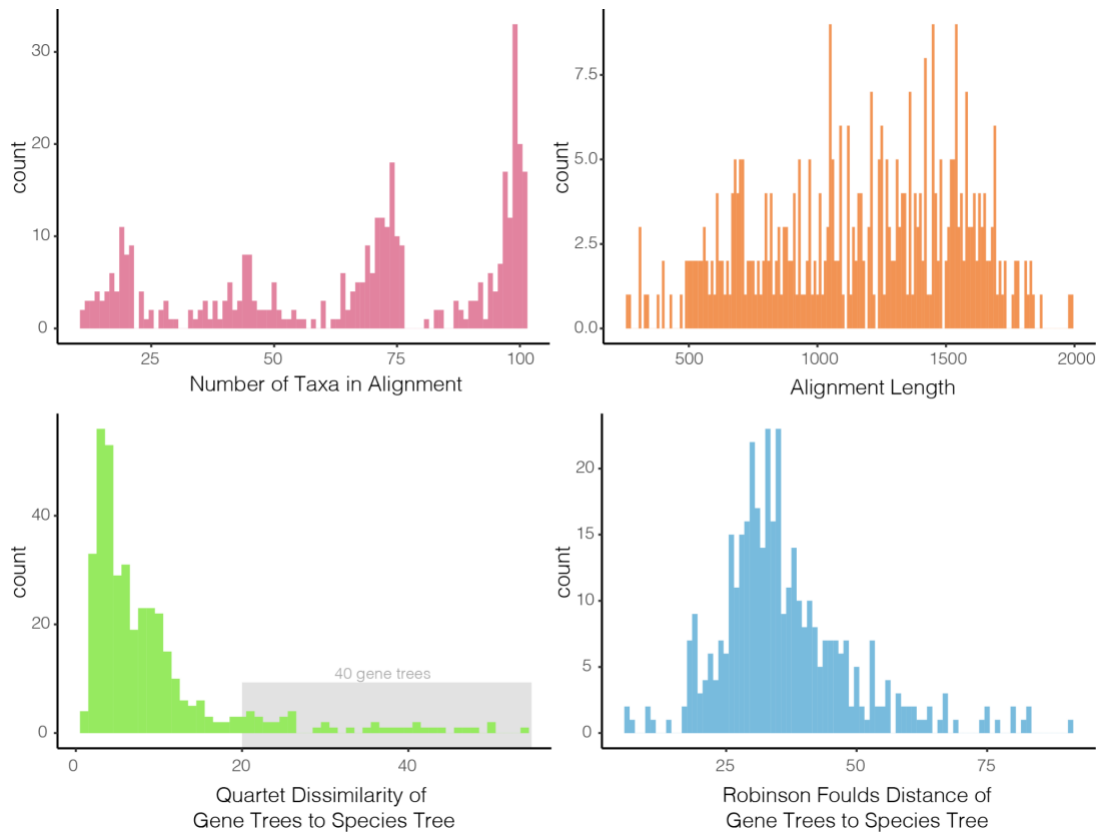

736  
737  
738  
739  
740  
741  
742

Figure S2. Basic summary statistics of the 450 locus alignments and gene trees. Top row shows histograms of the number of taxa in (max=101, min=11) and length of each alignment. Bottom row shows gene tree--species tree distances as quartet dissimilarity scores and Robinson Foulds distances, two different measures of topological similarity. Both quartet dissimilarity and RF scores are estimated by first subsetting the species tree to match gene tree sampling.

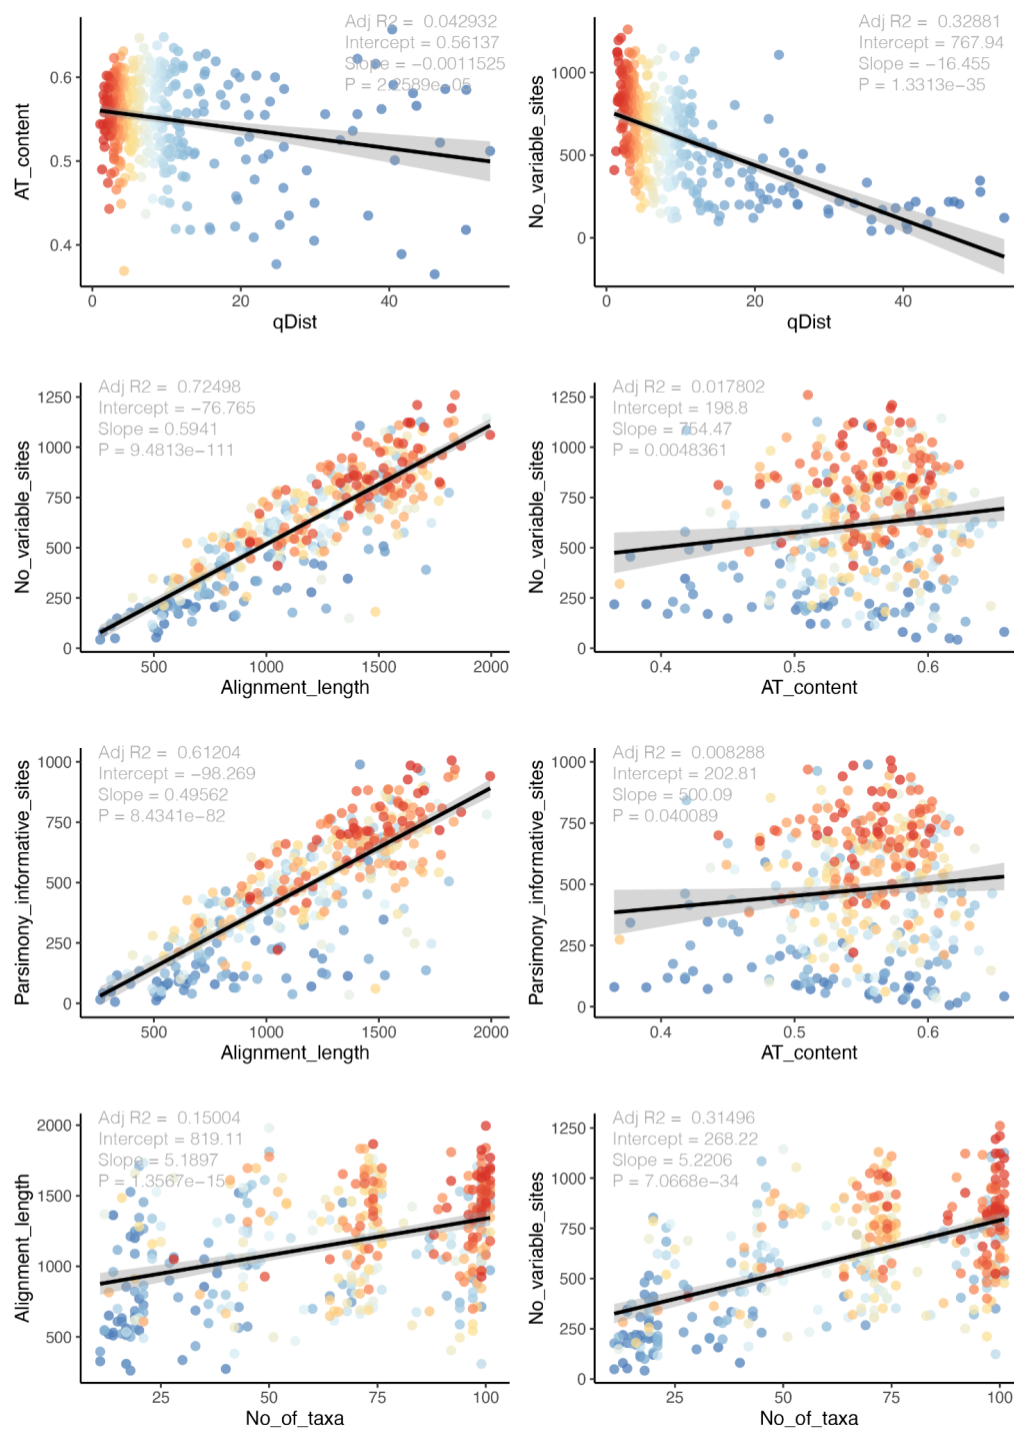

743  
 744 Figure S3. Detailed summary statistics of the 450 locus alignments and gene trees. Top row  
 745 compares AT content and number of variable sites against quartet distance between each gene tree  
 746 and the species tree (a measure of topological similarity). The second and third rows compare  
 747 measures of locus informativeness (number of variable sites, number of parsimony informative  
 748 sites) against alignment length and AT content. The bottom row shows alignment length and  
 749 number of variable sites as a function of the number of taxa in the alignment. In all plots points  
 750 (representing trees or alignments) are colored according to the quartet distance from the species  
 751 tree.

## AUSTRALIAN FROG PHYLOGENOMICS

752



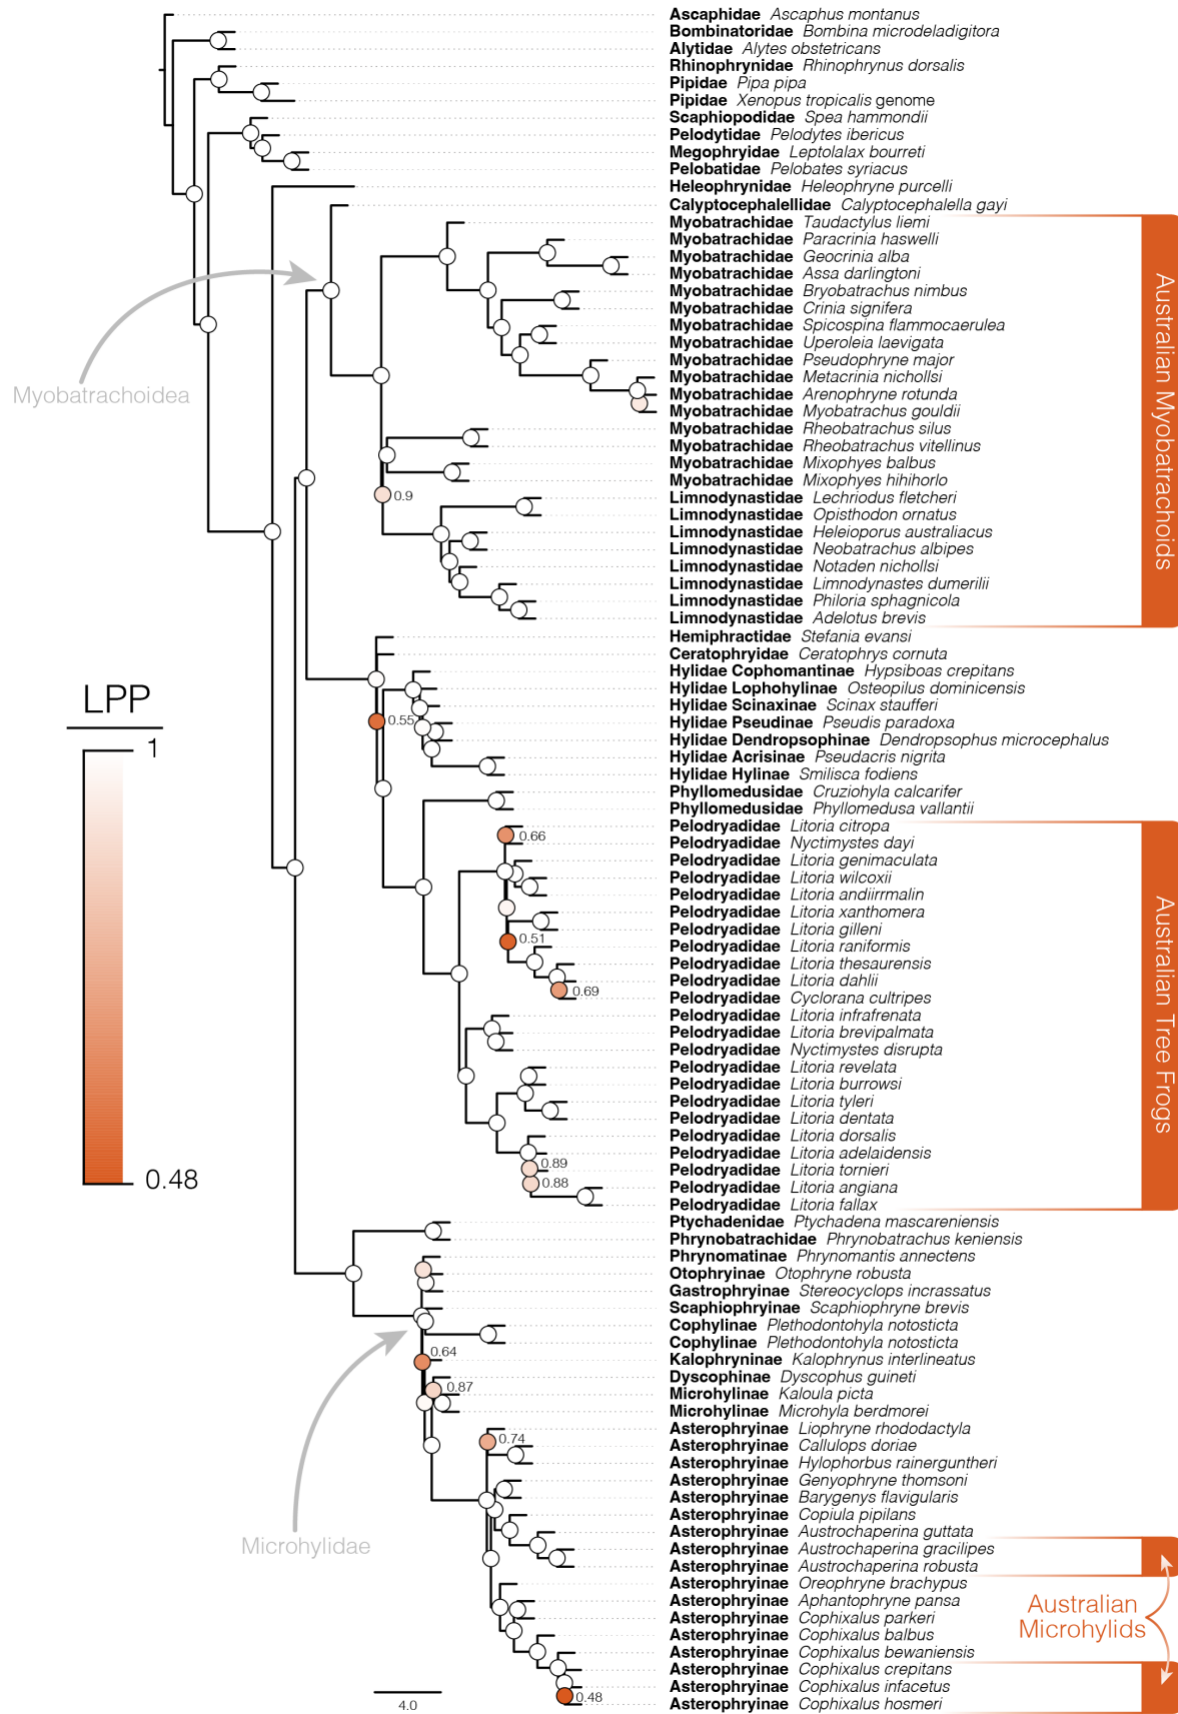

## AUSTRALIAN FROG PHYLOGENOMICS

754 Figure S4. Species tree of Australian frogs and appropriate outgroup taxa estimated using  
755 ASTRAL with locus trees estimated by IQTREE as input. Phylogenetic resolution among major  
756 frog groups and within Australian frog clades is consistently high. Ultrafast bootstrap support  
757 values (Hoang et al. 2018) are shown at nodes and colored according to local posterior probabilities  
758 (LPP), values  $>0.9$  are considered strongly supported and not indicated at nodes (white circles).

759  
760  
761

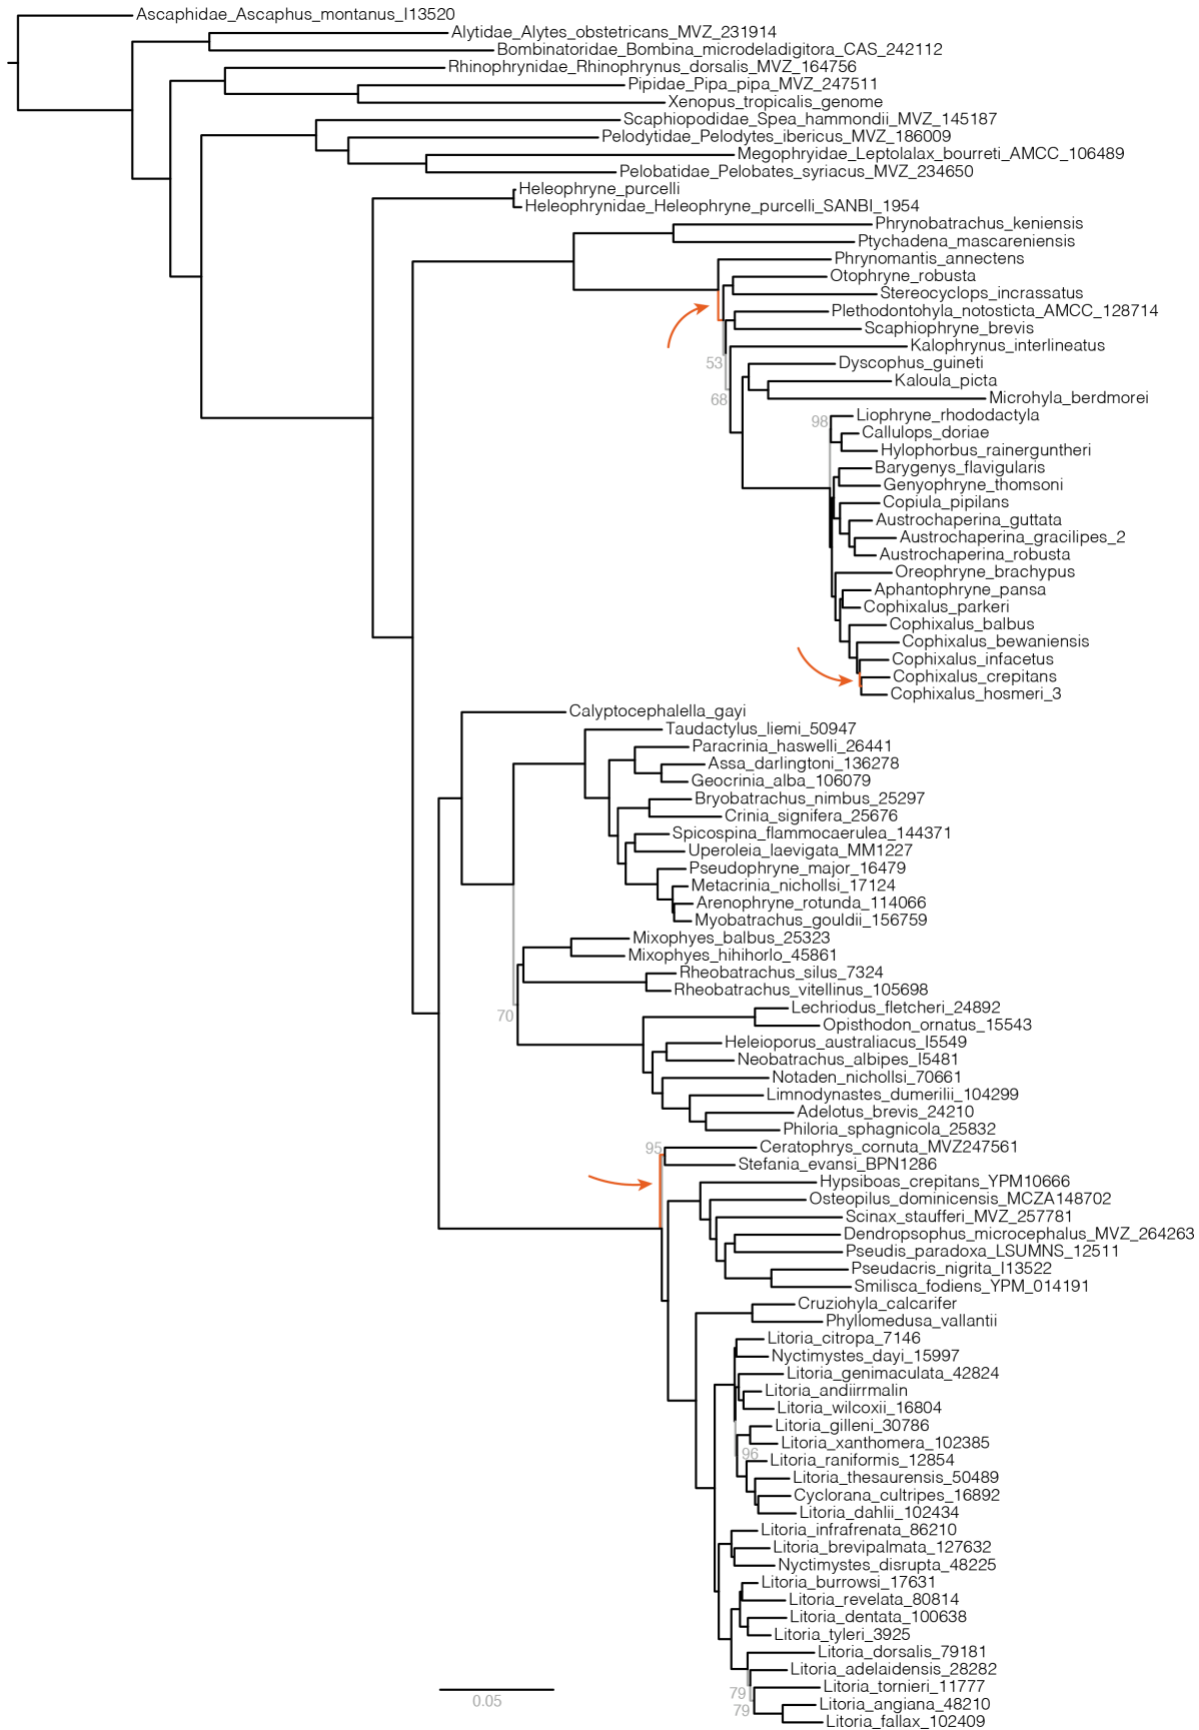

## AUSTRALIAN FROG PHYLOGENOMICS

763 Figure S5. Species tree of Australian frogs and appropriate outgroup taxa estimated from the  
764 concatenated sequence alignment under the GHOST model implemented in IQTREE.  
765 Phylogenetic resolution among major frog groups and within Australian frog clades is consistently  
766 high. Only ultrafast bootstrap support values less than 100 are noted, here by grey branches and  
767 text (Hoang et al. 2018). This topology is highly consistent with the phylogeny estimated using  
768 ASTRAL (Fig.2, S4), however three differences are highlighted by orange branches and arrows  
769 indicating their location. Branch lengths are weighted averages over four heterotachy classes.

770

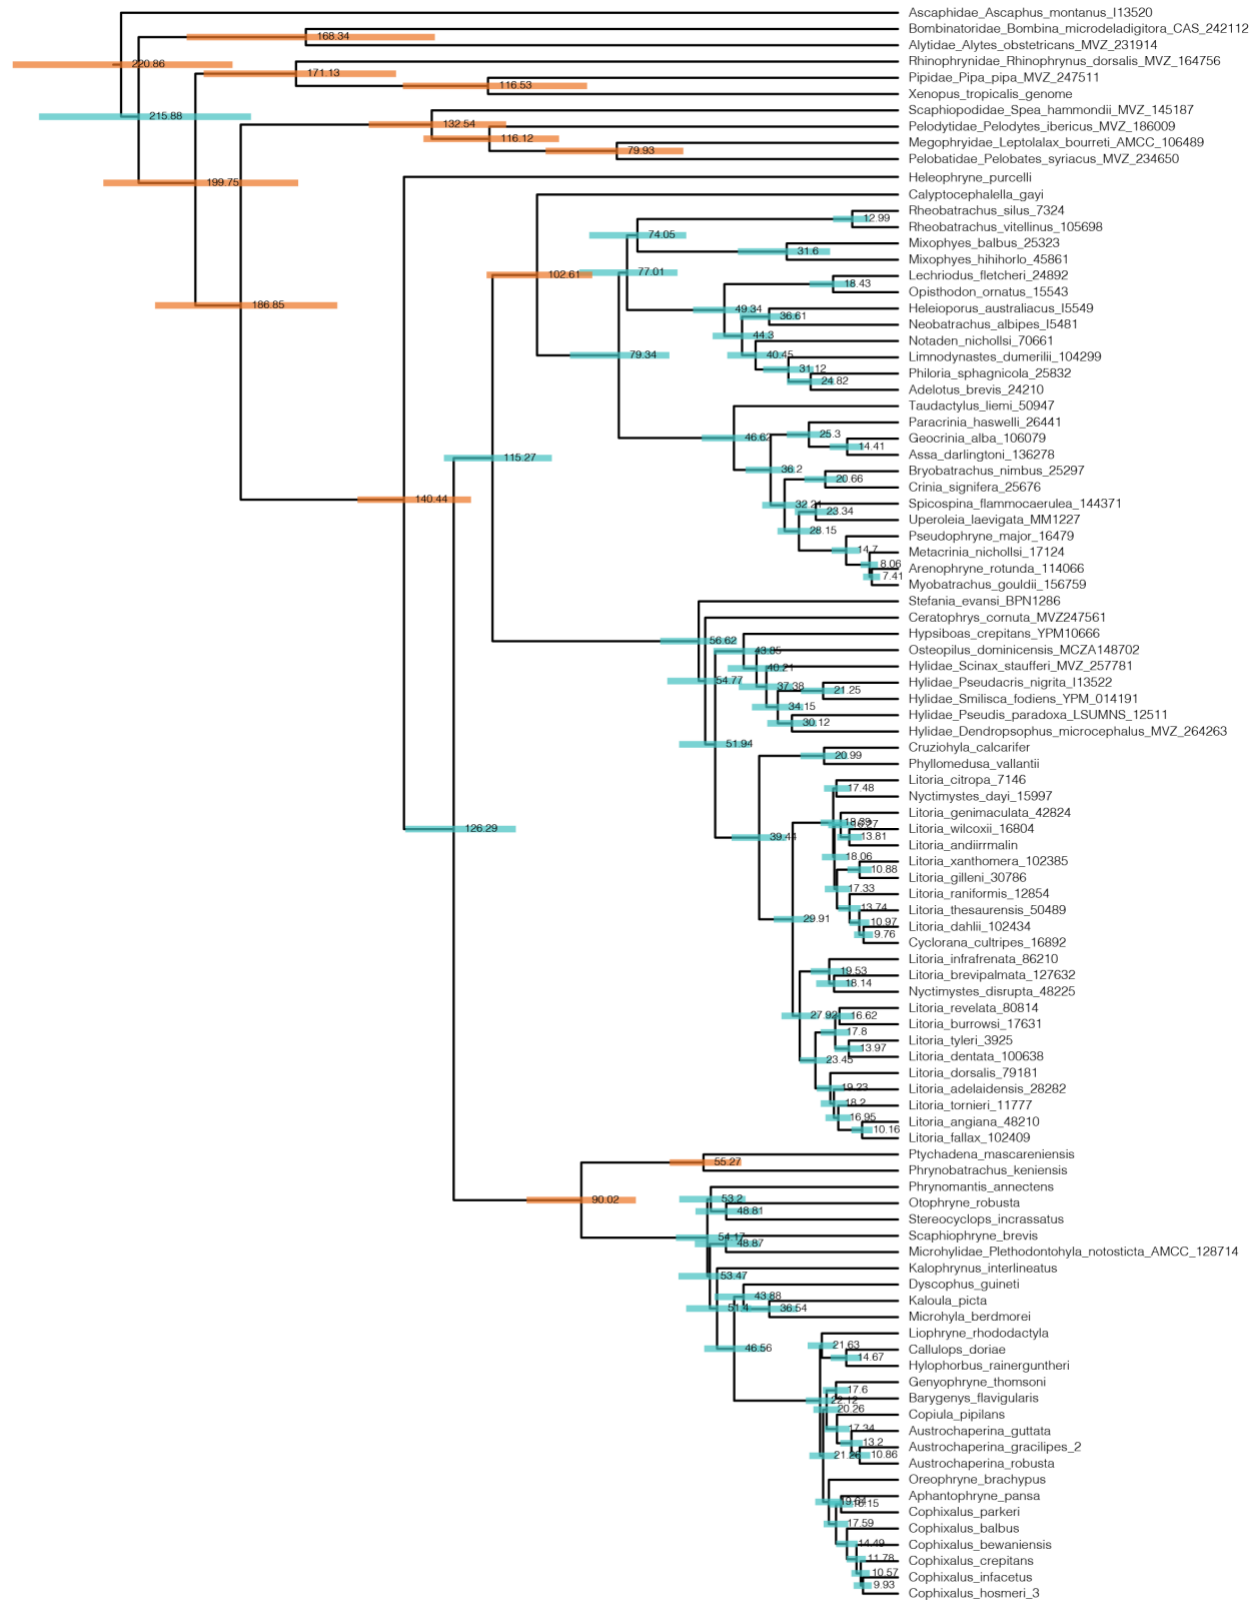

771

-250 -200 -150 -100 -50 0



## AUSTRALIAN FROG PHYLOGENOMICS

772 Figure S6. Species tree of Australian and outgroup frogs estimated with ASTRAL from IQTREE  
773 genetrees and time-calibrated with MCMCtree. Shaded bars at nodes indicate 95% confidence  
774 estimates on ages and numbers indicate mean age estimates. Orange shaded bars indicate nodes  
775 which were calibrated with from fossil evidence (see Table S2).  
776

Time-Stratified DEC+J+X+W Frogs *H1*

ancstates: global optim, 3 areas max. d=0.0011; e=2e-04; x=-0.5129; w=1.5756; j=0.1366; LnL=-91.47

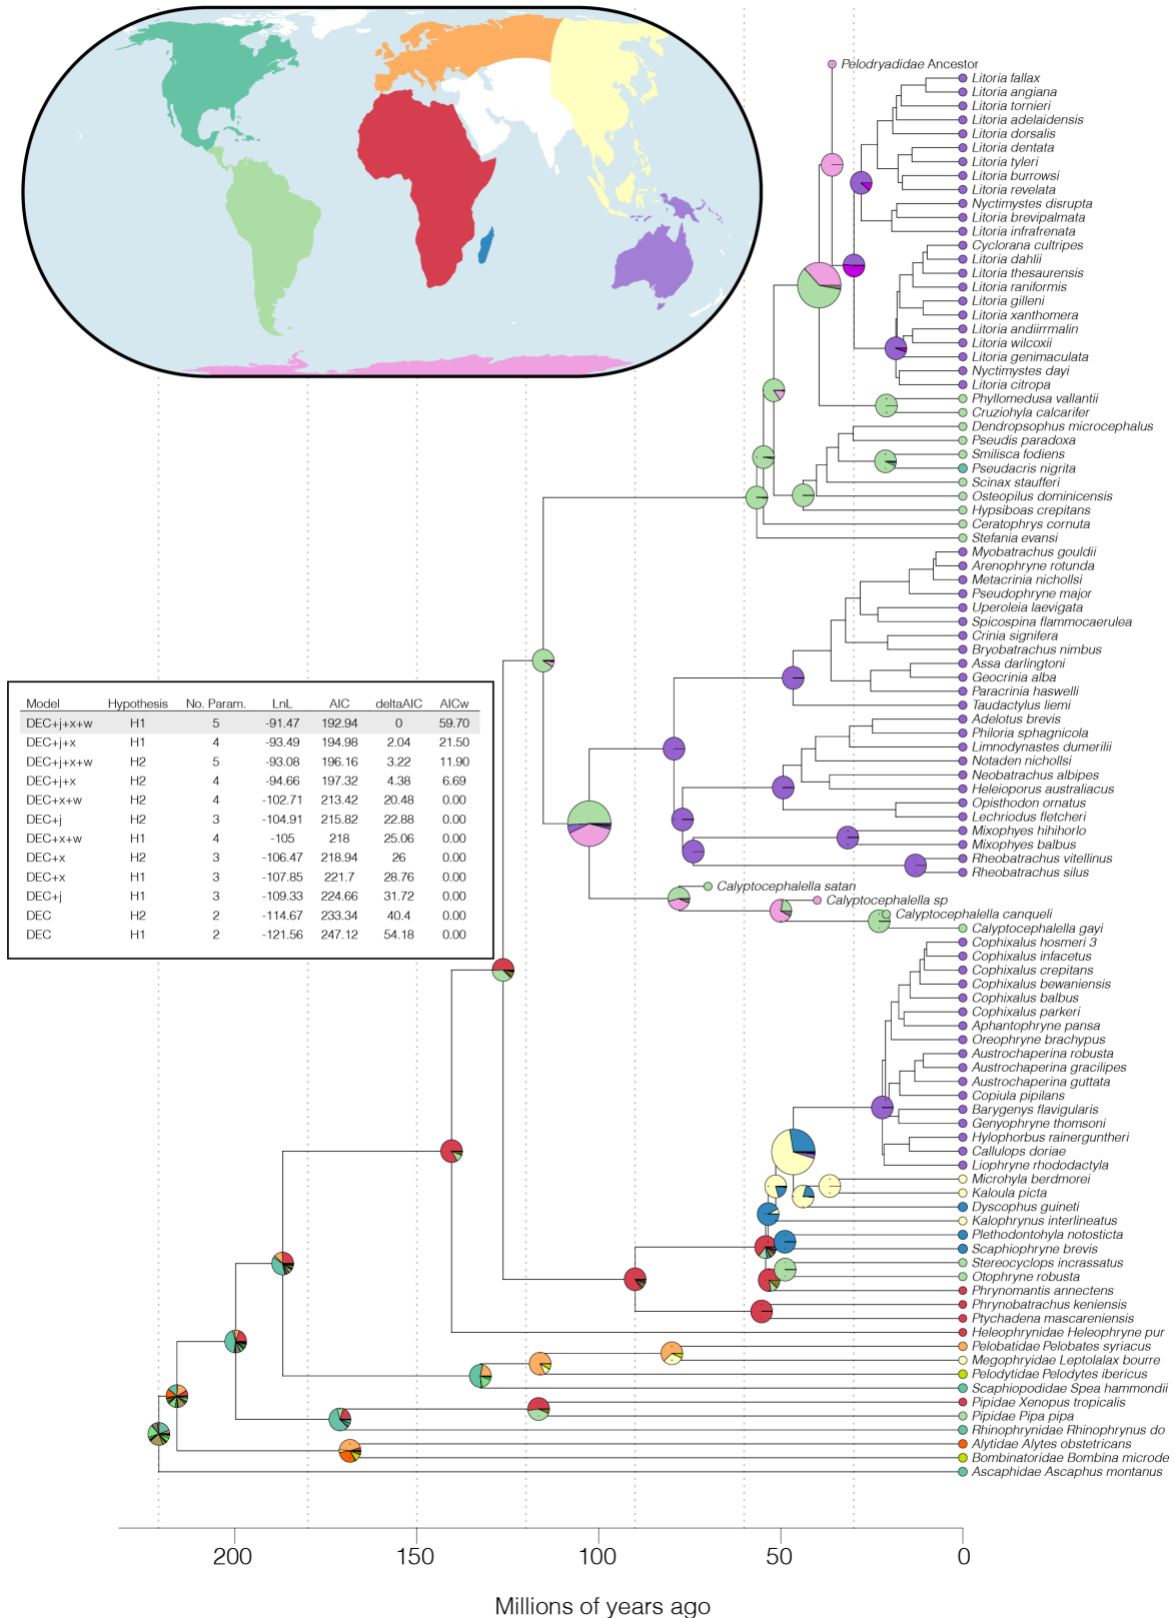

## AUSTRALIAN FROG PHYLOGENOMICS

778 Figure S7. Biogeographic history of frogs with a focus on the range reconstruction of Australian  
779 clades. Inset table shows the 12 models fit to the data (6 models across two ‘datasets’), ordered by  
780 deltaAIC. Ancestral range estimates under the preferred model DEC+*j*+*x*+*w* *HI* are shown at right  
781 as pie charts on the phylogenomic tree with several fossil taxa added. Pie chart for the most recent  
782 common ancestor of each Australian clade is enlarged to enhance visualization. The eight  
783 bioregions are shown in the inset map and colors correspond to the tip state of taxa on the tree.  
784 Additional colors in the pie charts correspond to combinations of areas, but are not discussed  
785 further.

786  
787  
788  
789  
790  
791  
792  
793  
794  
795  
796  
797  
798  
799  
800  
801  
802  
803  
804  
805  
806  
807  
808  
809  
810  
811

Supplementary References

- Agnolin, F. (2012). A new Calyptocephalellidae (Anura, Neobatrachia) from the Upper Cretaceous of Patagonia, Argentina, with comments on its systematic position. *Studia geologica salmanticensia*, 48(2), 129-178.
- Báez, A. M., & Gómez, R. O. (2018). Dealing with homoplasy: osteology and phylogenetic relationships of the bizarre neobatrachian frog *Baurubatrachus pricei* from the Upper Cretaceous of Brazil. *Journal of Systematic Palaeontology*, 16(4), 279-308.
- Hoang, D. T., Chernomor, O., Von Haeseler, A., Minh, B. Q., & Vinh, L. S. (2018). UFBoot2: improving the ultrafast bootstrap approximation. *Molecular biology and evolution*, 35(2), 518-522.
- Matzke, N. J. (2014). Model selection in historical biogeography reveals that founder-event speciation is a crucial process in island clades. *Systematic biology*, 63(6), 951-970.
- Moura, P. H. A., Costa, F. R., Anelli, L. E., & Nunes, I. (2021). A new genus of fossil frog (Anura) from lower Cretaceous deposits in South America. *Anais da Academia Brasileira de Ciências*, 93.
- Muzzopappa, P., & Báez, A. M. (2009). Systematic status of the mid-Tertiary neobatrachian frog *Calyptocephalella canqueli* from Patagonia (Argentina), with comments on the evolution of the genus. *Ameghiniana*, 46(1), 113-125.
- Nicoli, L., Muzzopappa, P., Espinoza, N., & Melchor, R. (2022). A new fossil species of *Calyptocephalella* (Anura: Australobatrachia) from the Miocene of northern Patagonia: Novel evidence of the broad past diversity of the genus. *Journal of South American Earth Sciences*, 119, 104008.
- Van Dam, M. H., & Matzke, N. J. (2016). Evaluating the influence of connectivity and distance on biogeographical patterns in the south-western deserts of North America. *Journal of Biogeography*, 43(8), 1514-1532.
